# Supplementary material
Source: publisher figshare collection journal article supplement (https://acs.figshare.com/ndownloader/files/4055839)
Supplement: Supplementary file 1 [file 4055839]

**Supporting information for:**

**Rhodopsin Absorption from First Principles:**

**Bypassing Common Pitfalls**

Omar Valsson,<sup>†</sup> Pablo Campomanes,<sup>‡</sup> Ivano Tavernelli,<sup>‡</sup> Ursula Rothlisberger,<sup>\*,‡</sup>  
and Claudia Filippi<sup>\*,†</sup>

*MESA+ Institute for Nanotechnology, University of Twente, P.O. Box 217, 7500 AE Enschede,  
The Netherlands, and Laboratory of Computational Chemistry and Biochemistry, Ecole  
Polytechnique Fédérale de Lausanne (EPFL), CH-1015 Lausanne, Switzerland*

E-mail: ursula.roethlisberger@epfl.ch; c.filippi@utwente.nl

---

<sup>\*</sup>To whom correspondence should be addressed

<sup>†</sup>MESA+ Institute for Nanotechnology, University of Twente, P.O. Box 217, 7500 AE Enschede, The Netherlands

<sup>‡</sup>Laboratory of Computational Chemistry and Biochemistry, Ecole Polytechnique Fédérale de Lausanne (EPFL),  
CH-1015 Lausanne, Switzerland

# 1 Computational Details

## 1.1 ZINDO, TDDFT, and CC2 calculations

We employ the Gaussian 09 code<sup>S1</sup> to perform the ZINDO calculations, using the default settings, and the TDDFT calculations with the CAM-B3LYP<sup>S2</sup> and LC- $\omega$ PBE<sup>S3,S4</sup> functionals, and the 6-31+G\* basis set. For the CC2 calculations, we use the TURBOMOLE code<sup>S5</sup> where we employ the resolution-of-the-identity (RI) approximation<sup>S6</sup> and the ANO-L-VDZP<sup>S7</sup> basis set. Since a corresponding RI auxiliary basis set is not available for the ANO-L-VDZP basis set, we use the aug-cc-pVQZ auxiliary basis set.<sup>S8,S9</sup> We have adopted and validated this procedure in our recent work on cyanine dyes.<sup>S10</sup> The TDDFT/MM and CC2/MM calculations are performed by including the partial MM charges as point charges.

## 1.2 CASPT2 Calculations

For the CASPT2 calculations, we use the MOLCAS 7.2<sup>S11</sup> code. Unless otherwise stated, we employ the default IPEA zero-order (S-IPEA) Hamiltonian<sup>S12</sup> and report the single-state (SS) CASPT2 values. We use a constant imaginary level shift<sup>S13</sup> of 0.1 a.u. and the ANO-L-VDZP<sup>S7</sup> basis set. We use the Cholesky decomposition of the two-electron integrals<sup>S14</sup> with the threshold of  $10^{-4}$ . The default convergence criteria are used for all calculations. We do not correlate as many of the lowest  $\sigma$ -orbitals as there are heavy atoms in the molecule. In the CAS active space, we include all 12  $\pi$  electrons in the reference, and test the use of 12 to 15 active  $\pi$  orbitals, resulting in a CAS(12,12) to CAS(12,15) expansion. We use a state-average (SA) CASSCF wave function with equal weights over either the two ( $S_0$  and  $S_1$ ) or three ( $S_0$ ,  $S_1$ , and  $S_2$ ) lowest-energy states. The CASPT2/MM calculations are performed by including the partial point charges using the ESPF<sup>S15</sup> electrostatic coupling scheme implemented in Molcas.

## 1.3 NEVPT2 Calculations

The  $n$ -electron valence state perturbation theory<sup>S16–S19</sup> (NEVPT2) calculations in the strongly contracted (SC) variants are performed using the ORCA 2.8 code.<sup>S20,S21</sup> In the CASSCF calculations with the ORCA code, the RIJCOSX approximation<sup>S22</sup> for the CASSCF steps and the RI approximation<sup>S6</sup> for the integral transformation steps are used. Since a corresponding RI auxiliary basis set is not available for the ANO-L-VDZP basis set, we use the aug-cc-pVTZ auxiliary basis set.<sup>S8,S9</sup> We have adopted and validated this procedure in our recent work on cyanine dyes.<sup>S10</sup> The orbital energies for the doubly occupied and virtual orbitals appearing in the Dyall Hamiltonian<sup>S23</sup> (used for the definition of the zero order Hamiltonian in NEVPT2) are obtained by the diagonalization of a generalization of the Fock operator<sup>S24</sup> (canonical orbital option in ORCA).

In the construction of the third- and fourth-order density matrices, the CASSCF wave function is truncated so that only configurations with a weight larger than a threshold of  $10^{-8}$  are kept. In the computation of the NEVPT2 excitation energies, we use the same CASSCF wave functions as in the CASPT2 calculations described above. The NEVPT2/MM are performed by including the partial MM charges as point charges.

## 1.4 Quantum Monte Carlo Calculations

The program package CHAMP<sup>S25</sup> is used for the QMC calculations. We employ scalar-relativistic energy-consistent Hartree-Fock pseudopotentials<sup>S26</sup> where the carbon, nitrogen, and oxygen  $1s$  electrons are replaced by a non-singular  $s$ -non-local pseudopotential and the hydrogen potential is softened by removing the Coulomb divergence. Different Jastrow factors are used to describe the correlation with different atom types and, for each atom type, the Jastrow factor consists of an exponential of the sum of two fifth-order polynomials of the electron-nuclear and the electron-electron distances, respectively.<sup>S27</sup> In all DMC calculations we use a CAS(12,12) expansion and a SA-CASSCF wave functions optimized over two states with equal weights. The starting determinantal components are obtained in CASSCF calculations which are performed with the program GAMESS(US).<sup>S28</sup> The final CAS expansions are expressed on the weighted-average CASSCF natural orbitals. The CAS wave functions of the ground and excited states are truncated with 0.04 threshold on the CSF coefficients and the union set of surviving CSF's for the states of interest are retained in the QMC calculations. The Jastrow correlation factor and the CI coefficients are optimized by energy minimization in a state-averaged sense within VMC with equal weights.<sup>S29</sup> The pseudopotentials are treated beyond the locality approximation<sup>S30</sup> and an imaginary time step of 0.08 a.u. is used in the DMC calculations. We use the Gaussian basis sets<sup>S26</sup> constructed for our pseudopotentials and, specifically, the cc-pVDZ basis augmented with  $s$  and  $p$  diffuse functions<sup>S31</sup> on the heavy atoms.

The QMC/MM calculations are performed using the electrostatic coupling scheme as in the QM/MM approach employed in the CPMD code.<sup>S32</sup> For the starting trial wave function, CASSCF/MM calculations are performed within GAMESS(US), and the divergence of point charges at the origin is removed to resemble the embedding scheme employed within CPMD.

## 1.5 Excited-state QM/MM simulations

In the QM/MM excited-state calculations, we employ two different QM regions, one including only the chromophore (RPSB) and the other including the chromophore and the Glu113 counterion (RPSB+Glu113). For the RPSB chromophore, the QM/MM boundary is along  $C_\gamma$ - $C_\delta$  bond of the Lys296 residue and, for Glu113, it is along the  $C_\alpha$ - $C_\beta$  bond. The valency of the QM region is saturated by adding hydrogen capping atoms at the QM/MM boundary. The MM environment is

modeled by employing partial point charges for the MM atoms with the parameters taken from the Amber force field.

To avoid over-polarization of the QM region, we turn off (set to zero) the partial point charges for a small group of MM atoms at the QM/MM boundary. To do this in a balanced way, we turn off whole charge groups which have a total charge close to zero (as defined in the Amber force field). Therefore, the MM charges for the following atoms are set to zero:

- RPSB QM region:
  - For the Lys296 residue,  $C_\gamma$  together with the two bonded hydrogens (CG, HG2, HG3)
- RPSB+Glu113 QM region:
  - For the Lys296 residue,  $C_\gamma$  together with the two bonded hydrogens (CG, HG2, HG3)
  - For the Glu113 residue,  $C_\alpha$  and N on the backbone together with the two bonded hydrogens (CA HA N H), which are all in the same charge group

However, we note that over-polarization of the QM region does not seem to be a serious issue for the excited-state calculations: In CAM-B3LYP calculations for Frame 4 where the charges are not turned off, we obtain excitations (for both QM regions) that differ by only 0.01 eV from the values obtained with the charges set to zero. Finally, we stress that setting these charges to zero is only performed for the excited-state QM/MM calculations and that the ground-state QM/MM MD simulations with CP2K (as described in the paper) are performed with the full MM charges.

## 1.6 Comparison with Previous CASPT2/MM Studies

The CASSCF/MM and CASPT2/MM calculations in the “Comparison with Previous CASPT2/MM and Other Studies” section are performed with a Molcas-Tinker<sup>S35</sup> interface where the MOLCAS 7.2 package is coupled with a modified version of the MM package Tinker 4.2.<sup>S36</sup>

In all geometrical optimizations of the Section “Comparison with Previous CASPT2/MM and Other Studies”, only the chromophore, the Lys296 side-chain, and two nearby waters (wat2a and wat2b) are allowed to move while the rest of the protein is kept frozen at the crystallographic coordinates. In the ground-state geometrical optimization of the QM part with Molcas, we employ the 6-31G\* basis set and use either the CASSCF method (with a single-state wave function and a CAS(12,12) expansion) or the DFT method (with the BLYP<sup>S37,S38</sup> functional).

We consider two structural models for the complete protein. The first model is given by the Rhodopsin structure from refs S33, S34, which was kindly provided by N. Ferré and is described in the same references. The model was constructed from chain A of the 1U19<sup>S39</sup> crystallographic structure, and only the chromophore included in the QM region with the QM/MM boundary along the  $C_\delta$ - $C_\epsilon$  bond of the Lys296 residue. The MM environment was described with the Amber

and TIP3P force fields. In the original paper,<sup>S33</sup> the structure of this model was optimized at the CASSCF/Amber level, where only the chromophore, the Lys296 side-chain, and two nearby waters (wat2a and wat2b) were allowed to relax while the rest of the protein was kept frozen at the crystallographic coordinates.

In the construction of the second model, we also start from chain A of the 1U19<sup>S39</sup> crystallographic structure as done in Ref. S33, but add the hydrogens according to the protonation states we employ for all other calculations described in the paper. Then, we follow the recipe of Ref. S33 and relax all hydrogens and waters in an MM energy minimization, keeping the rest of the protein fixed. Only the chromophore is included in the QM region and the QM/MM boundary is along the C $_{\gamma}$ -C $_{\delta}$  bond of the Lys296 residue. The MM environment is described using the Amber and TIP3P force fields.

In order to be compatible with the previous CASPT2/MM studies in refs S33, S34, we present always the SS-CASPT2 excitations, and use the same SA-CASSCF wave function as employed there, that is, a CAS(12,12) expansion over three equally weighted states (S $_0$ , S $_1$ , and S $_2$ ). To compute the CASPT2 excitations, we employ either the older (0-IPEA) zero-order Hamiltonian without IPEA shift used in refs S33, S34 or the standard S-IPEA zero-order Hamiltonian which we employ in all other sections here. We use a constant imaginary level shift<sup>S13</sup> of 0.1 a.u. and either the 6-31G\* or the ANO-L-VDZP<sup>S7</sup> basis set.

## 2 Vertical Excitation Energies for RPSB in the Gas Phase

Table S1: Vertical excitation energies (eV) of the 11-*cis* retinal protonated Schiff base (RPSB) in the gas phase computed on DFT, MP2, and CASSCF ground-state equilibrium geometries. The CASPT2, NEVPT2, and DMC results are from Ref. S40. We report the results obtained employing single-state (SS) CASPT2 and strongly contracted (SC) NEVPT2. The bond length alternation (BLA), the C<sub>6</sub>-N<sub>16</sub> distance, and the angle of the  $\beta$ -ionone ring ( $\phi_{\text{C5-C6-C7-C8}}$ ) are also listed.

|                                   | Geometry         |                    |                     |       |        |
|-----------------------------------|------------------|--------------------|---------------------|-------|--------|
|                                   | DFT/BLYP<br>(0%) | DFT/B3LYP<br>(20%) | DFT/M06-2X<br>(54%) | MP2   | CASSCF |
| BLA (Å)                           | 0.024            | 0.033              | 0.051               | 0.044 | 0.101  |
| $d_{\text{C6-N16}}$ (Å)           | 11.73            | 11.62              | 11.52               | 11.53 | 11.50  |
| $\phi_{\text{C5-C6-C7-C8}}$ (°)   | -29.7            | -33.5              | -38.0               | -40.5 | -68.8  |
| Vertical excitation energies (eV) |                  |                    |                     |       |        |
| CASPT2/0-IPEA                     | 1.77             | 1.85               | 1.94                | 1.89  | 2.27   |
| CASPT2/S-IPEA                     | 2.12             | 2.20               | 2.30                | 2.24  | 2.61   |
| NEVPT2                            | 2.18             | 2.26               | 2.33                | 2.27  | 2.60   |
| DMC                               | 2.22(4)          | 2.37(3)            | -                   | -     | -      |
| TDDFT/B3LYP                       | 2.27             | 2.29               | 2.25                | 2.22  | 1.89   |
| TDDFT/CAM-B3LYP                   | 2.36             | 2.43               | 2.49                | 2.44  | 2.73   |
| TDDFT/LC- $\omega$ PBE            | 2.39             | 2.48               | 2.61                | 2.54  | 3.01   |

For the BLYP, B3LYP, and M06-2X DFT functionals, the percentage of exact exchange is reported in parenthesis. The TDDFT excitations are obtained with the 6-31+G\* basis set. The CASPT2 and NEVPT2 excitations are obtained with the ANO-L-VDZP basis set and the DMC excitations with D+ basis set. The bond length alternation (BLA) is defined as the difference between the averages of the single and double carbon-carbon bonds lengths, and computed including the bonds between C<sub>5</sub> and C<sub>15</sub>.

We note that the PBE ground-state equilibrium geometry has the following geometrical parameters: BLA = 0.022 Å,  $d_{\text{C6-N16}}$  = 11.68 Å, and  $\phi_{\text{C5-C6-C7-C8}}$  = -28.6°. These geometrical parameters are very similar to the ones for the BLYP geometry, and, therefore, the PBE and BLYP ground-state equilibrium geometries should yield very similar excitation energy in the gas phase.

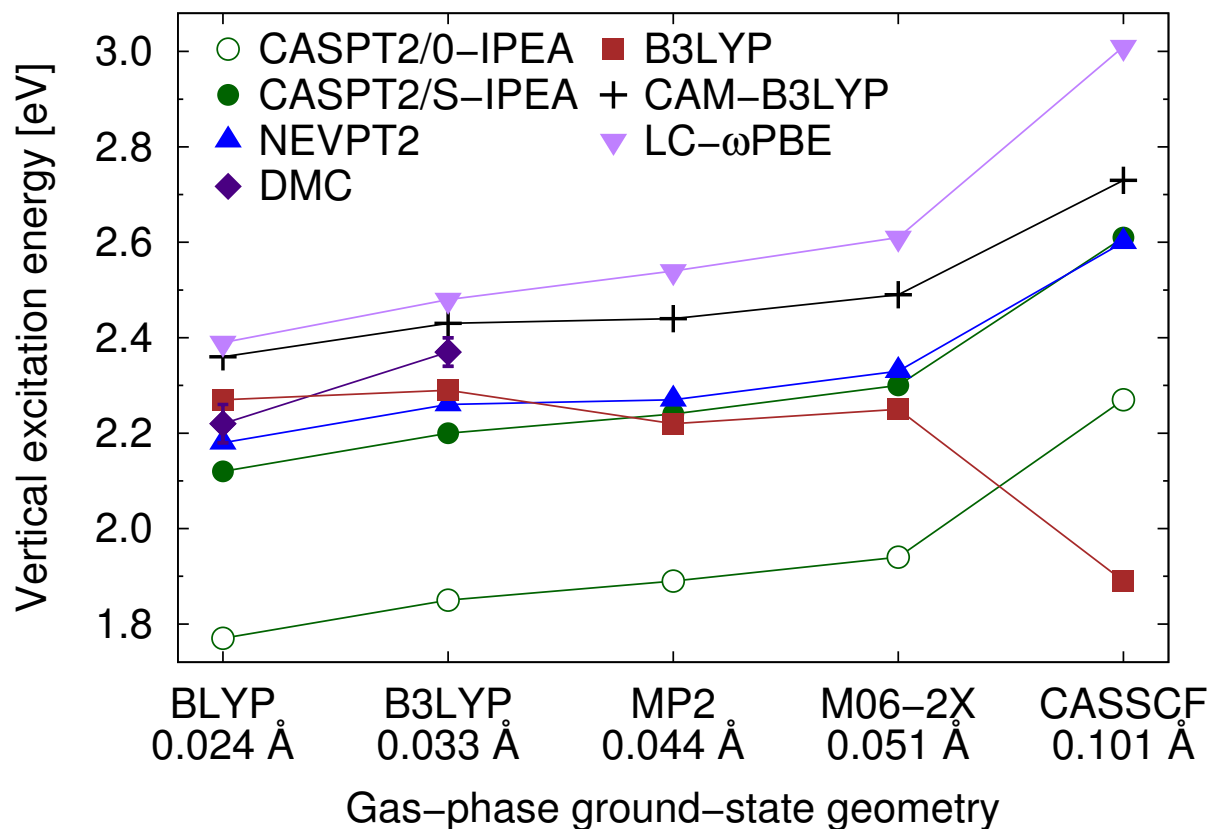

Figure S1: Vertical excitation energies (eV) of the 11-*cis* retinal protonated Schiff base (RPSB) in the gas phase, computed with TDDFT, CASPT2, NEVPT2, and DMC. See the caption of Table S1 for further information. For the ground-state geometries on the x-axis, we also report the bond length alternation (BLA) in Å.

In Figure S1, we observe that TDDFT in combination with the B3LYP functional displays the incorrect dependence on the BLA of the chromophore since the TDDFT/B3LYP excitation energy decreases with increasing BLA at variance with all highly-correlated approaches (this failure has been noted before in the literature<sup>S41</sup>). On the other hand, TDDFT in combination with the long-range corrected CAM-B3LYP and LC- $\omega$ PBE functionals leads to the correct dependence on the BLA. Therefore, for retinal systems, the use of the B3LYP functional is not suitable to compute the excitation energies, and a more appropriate choice is to employ the long-range corrected CAM-B3LYP and LC- $\omega$ PBE functionals. This warning against the use of B3LYP holds especially for TDDFT calculations in the protein environment, where the BLA of retinal is enhanced as compared to the gas phase.

### 3 Cluster Models

M2

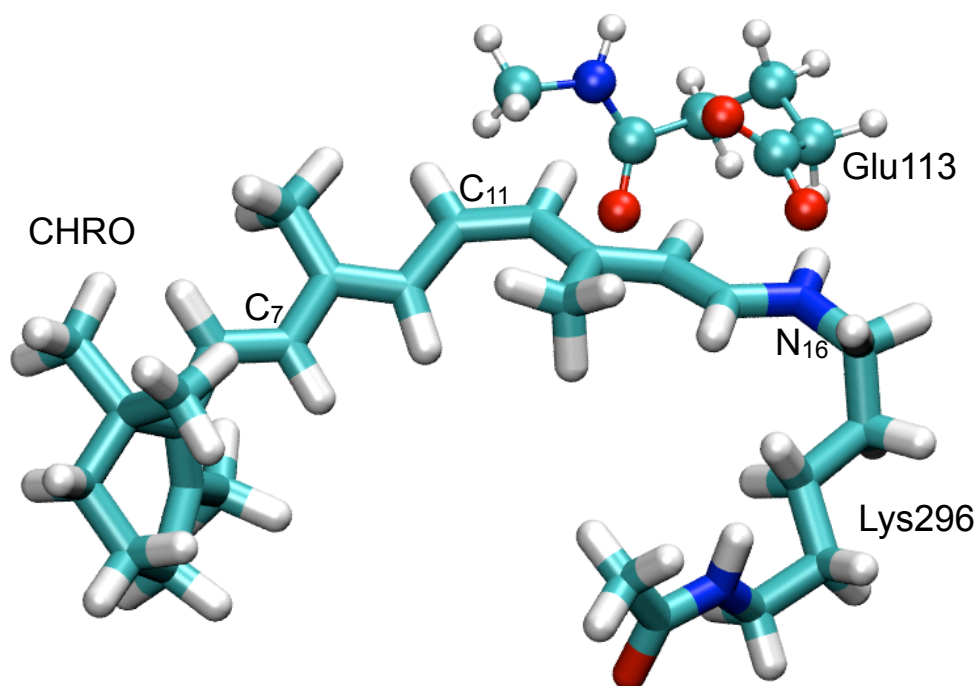

Figure S2: The M2 (CHRO + Glu113) cluster model employed in the Zindo and TDDFT calculations. The waters are not shown for clarity.



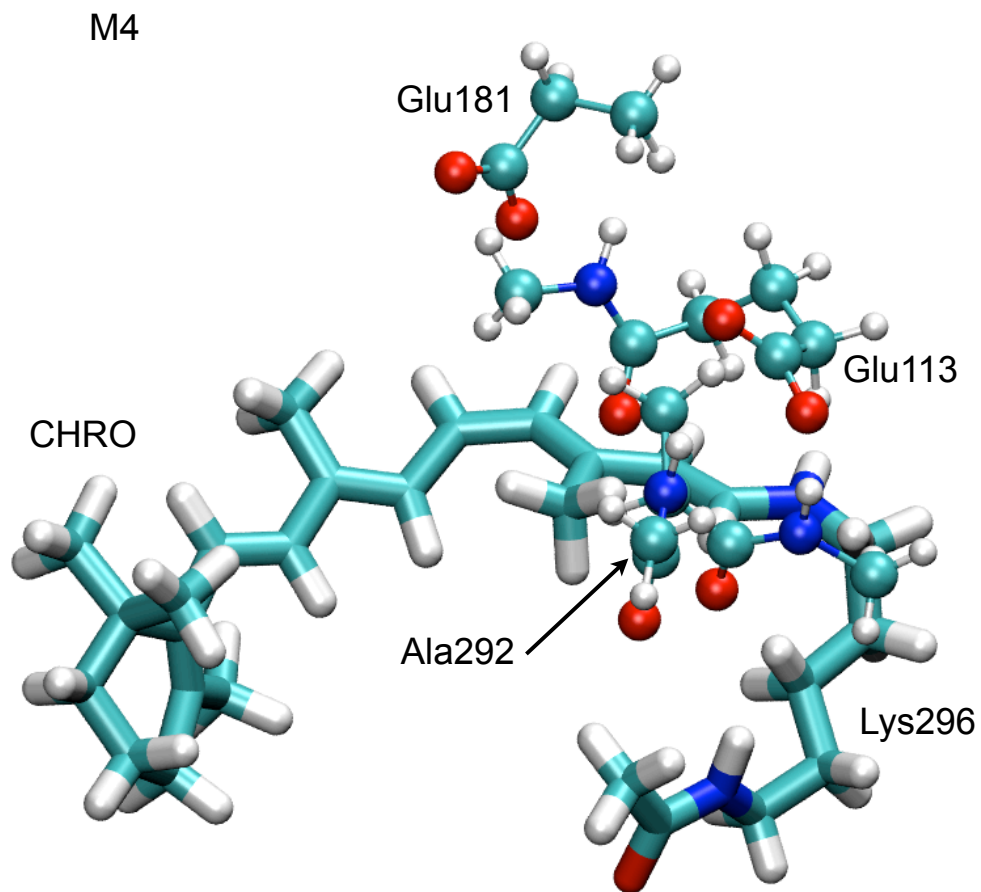

Figure S3: The M4 (M2 + Glu181 + Ala292) cluster model employed in the Zindo and TDDFT calculations. The waters are not shown for clarity.

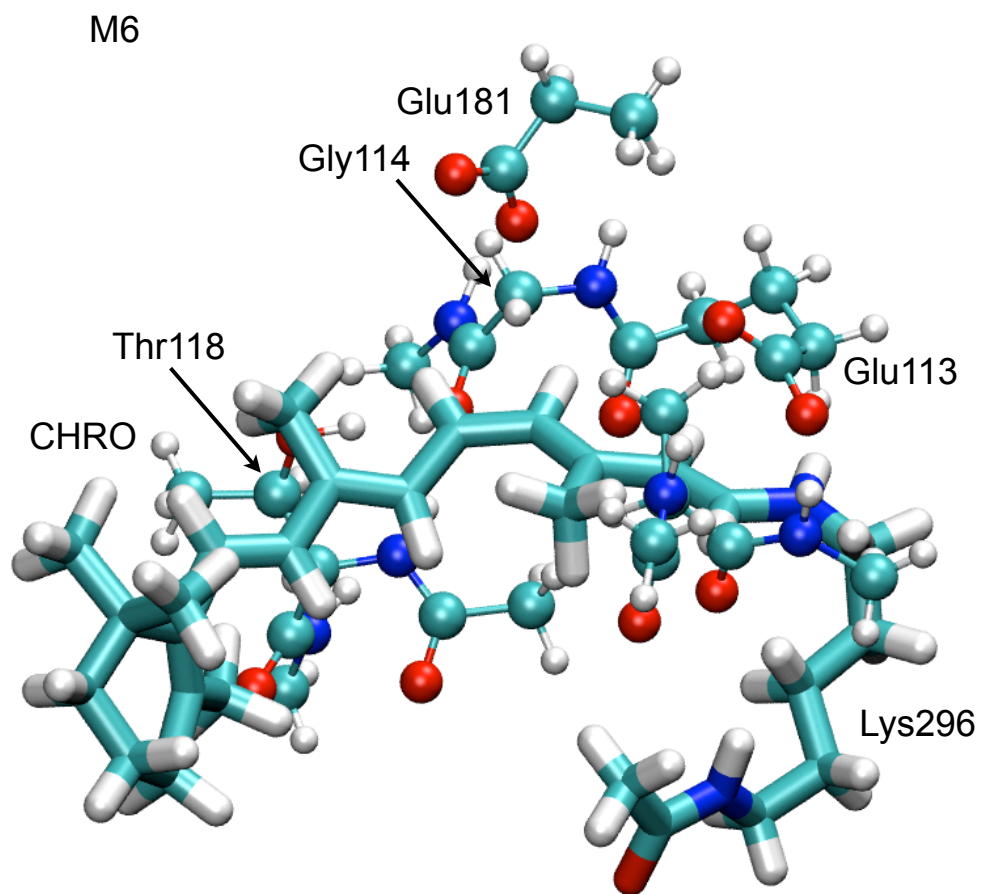

Figure S4: The M6 (M4 + Thr118 + Gly114) cluster model employed in the Zindo and TDDFT calculations. The waters are not shown for clarity.

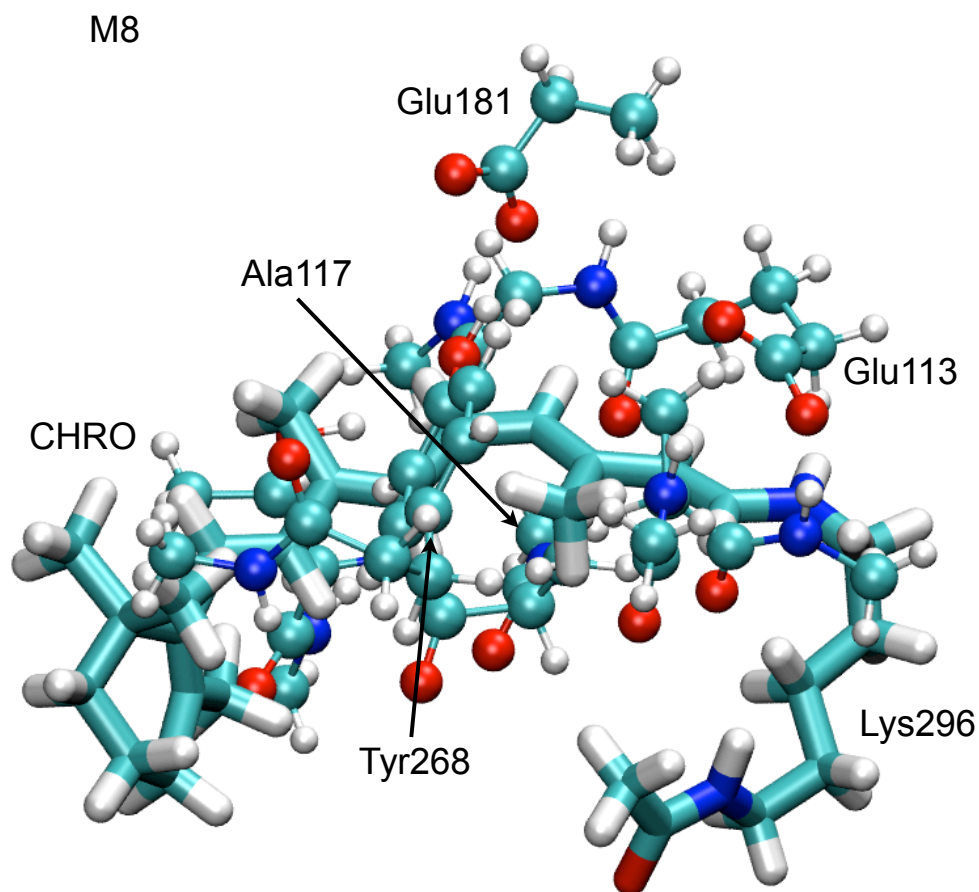

Figure S5: The M8 (M6 + Ala117 + Tyr268) cluster model employed in the Zindo and TDDFT calculations. The waters are not shown for clarity.

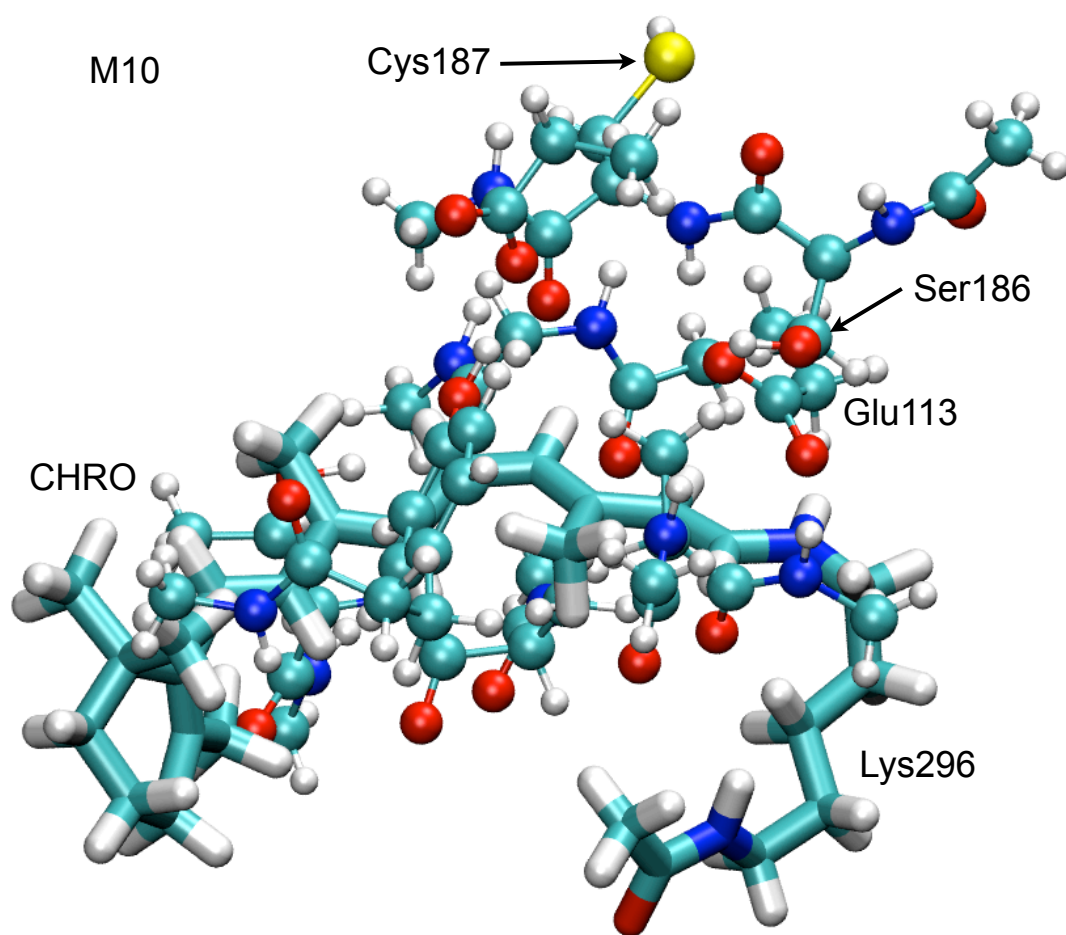

Figure S6: The M10 (M8 + Cys187 + Ser186) cluster model employed in the Zindo and TDDFT calculations. The waters are not shown for clarity.

## 4 Bond lengths for the RPSB in the Protein.

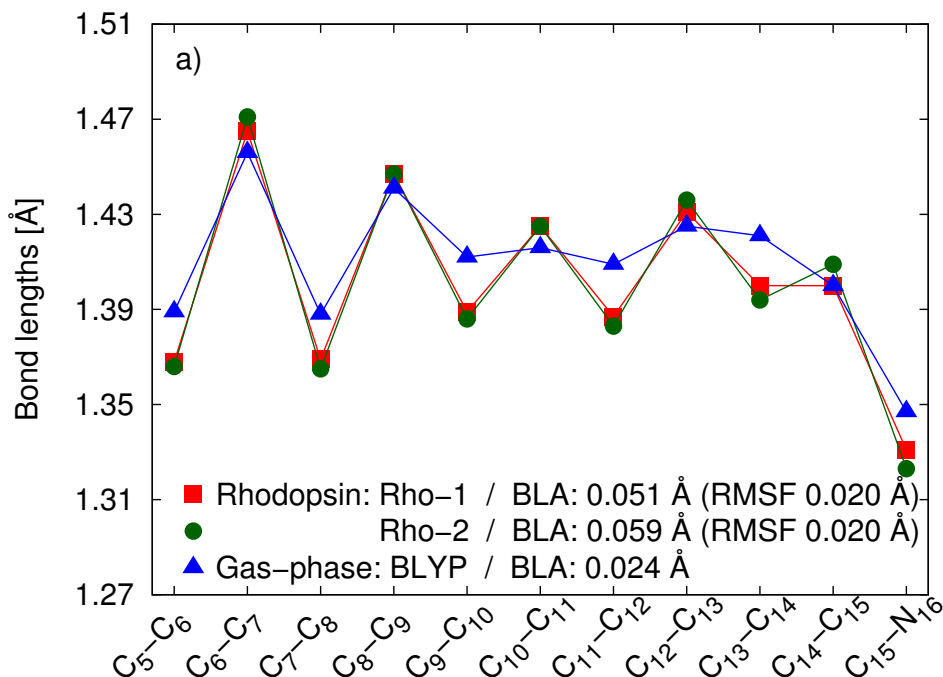

Figure S7: Average bond lengths of the RPSB chromophore from the **Rho-1** and **Rho-2** QM/MM MD simulations. The root mean square fluctuations (RMSF) for the average bond lengths are around 0.03 Å (not shown). For comparison, we also present the bond lengths of RPSB in the gas phase from Ref. S42, which are obtained in a geometrical optimization with DFT/BLYP (i.e. a GGA functional similar to the one employed in the QM/MM MD simulations).

We observe that the pattern of the average bond lengths from the QM/MM MD simulations display a clear alternation between single and double bonds. Furthermore, as compared to the gas phase, the interaction with the protein results in an enhanced bond length alternation.

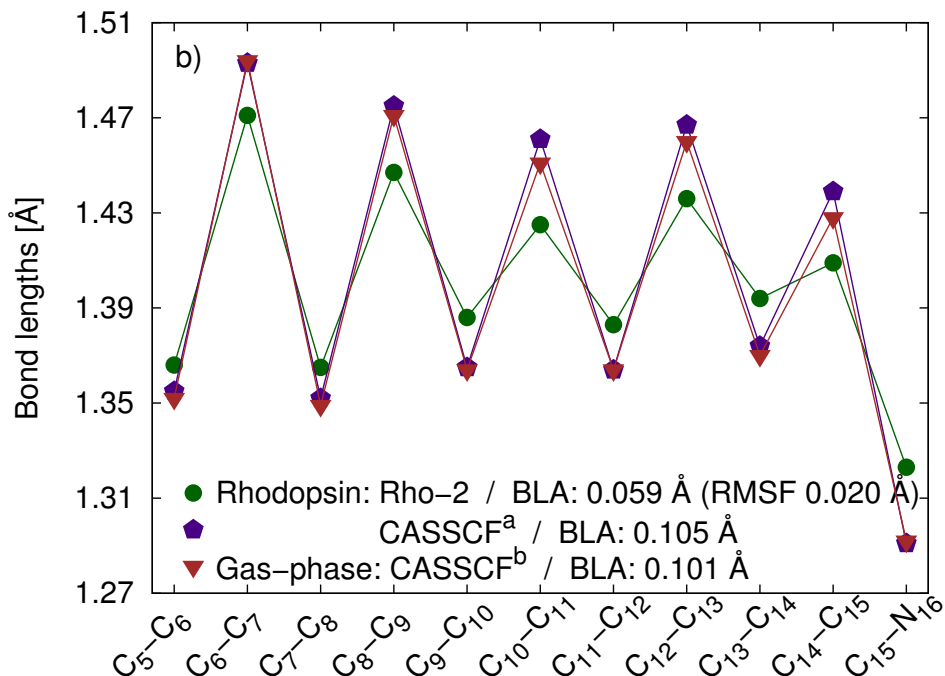

Figure S8: Average bond lengths of the RPSB chromophore from the **Rho-2** QM/MM MD simulations. For comparisons, we show the bond lengths obtained with the commonly employed CASSCF methods, both in Rhodopsin<sup>S33</sup> and the gas phase.<sup>S43</sup>

We observe the well known behavior of CASSCF, which yields an enhanced bond length alternation as compared to DFT. Furthermore, for CASSCF, there is almost no difference between the bond lengths in the gas phase and in the protein environment. We note that in our recent studies,<sup>S40,S44</sup> we have shown that CASSCF gives an inadequate structural description of RPSB in the gas phase.

## 5 ZINDO Absorption Spectra

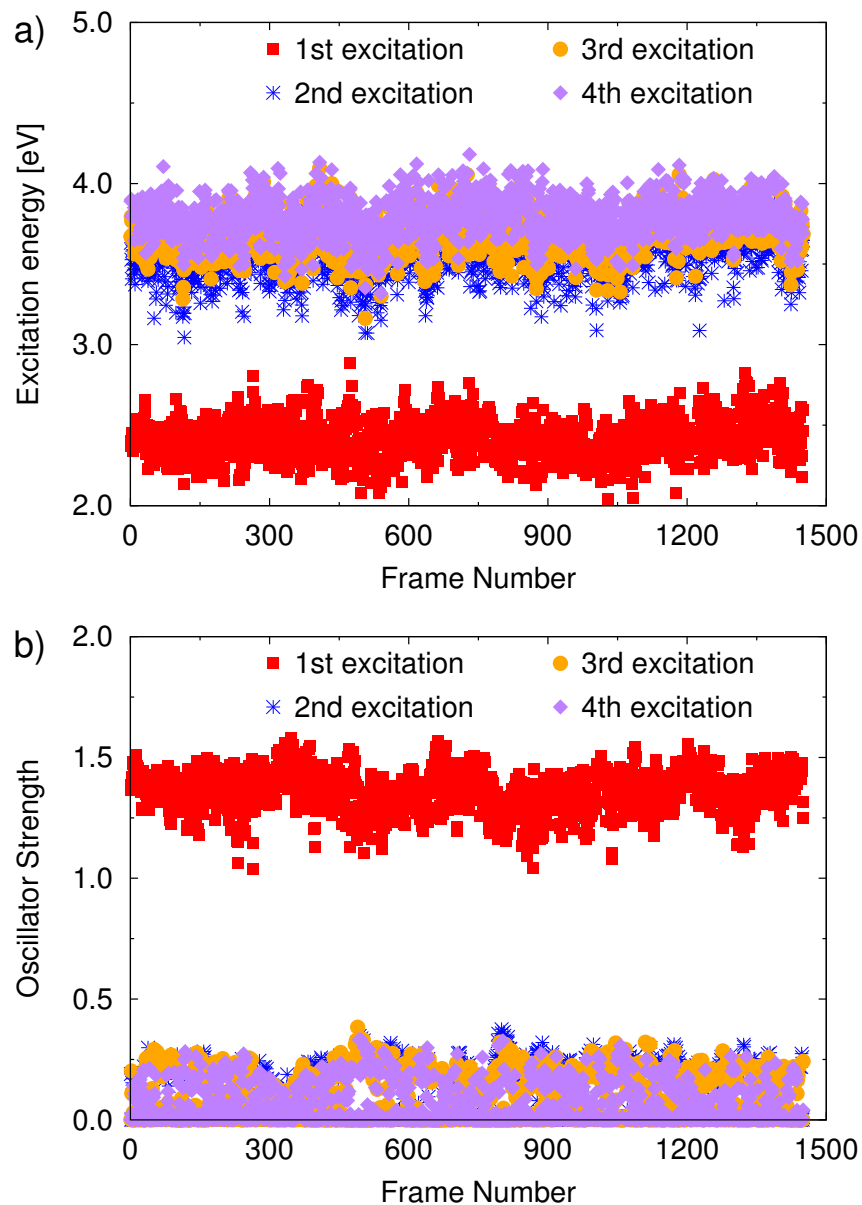

Figure S9: ZINDO excitation energies [panel a)] and corresponding oscillator strengths [panel b)] computed on the frames from the **Rho-2** trajectory. The lowest excitations (red, square symbols) correspond to the relevant, bright  $S_0 \rightarrow S_1$  excitation. We observe that the excitation energies and oscillator strengths of the lowest excitations are clearly separated from the higher excitations. Therefore, the inclusion of states higher than  $S_1$  does not appreciably affect the ZINDO absorption spectra.

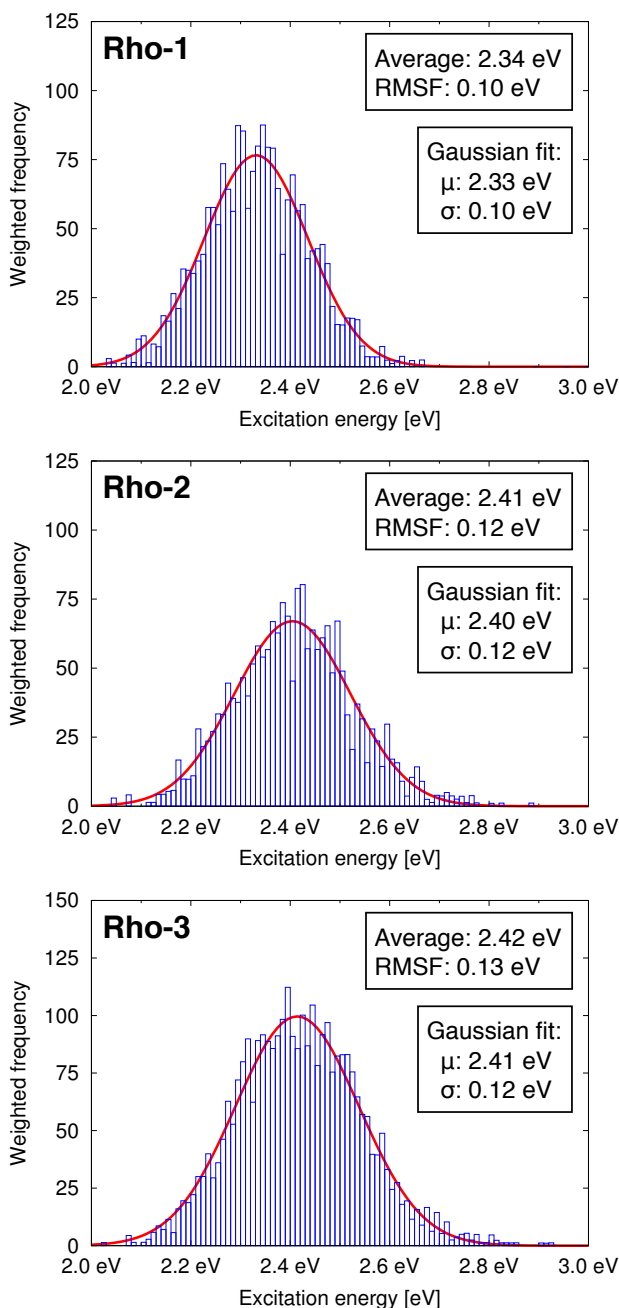

Figure S10: ZINDO absorption spectrum for the **Rho-1**, **Rho-2**, and **Rho-3** trajectories obtained as a histogram of the four lowest excitations weighted with the corresponding oscillator strength (blue boxes). For each trajectory, we report the average and root mean square fluctuation (RMSF) for the bright ( $S_0 \rightarrow S_1$ ) excitation energy. We also show a Gaussian fit of the histogram (red line) and report the mean ( $\mu$ ) and the standard deviation ( $\sigma$ ) obtained in the fit. For the histogram, we use bins of 0.01 eV and equidistant frames taken every 5 fs. We note that including only the bright ( $S_0 \rightarrow S_1$ ) excitation energy in the histogram gives the same spectrum as using all four excitations. This is consistent with the fact that in the ZINDO calculations, the higher excitations are clearly separated from the lowest, bright excitation (see Figure S9).



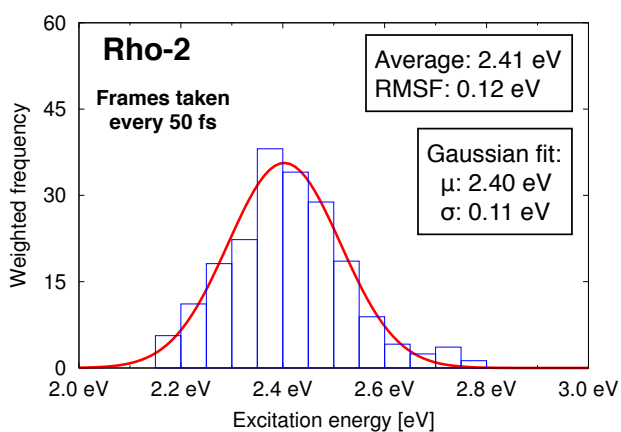

Figure S11: The ZINDO absorption spectrum for the **Rho-2** trajectory obtained using equidistant frames taken every 50 fs (instead of every 5 fs as in Figure S10). For this histogram, we employ bins of 0.05 eV. As discussed in note 84 in the paper, we estimate the excitation energy to be uncorrelated after about 50 fs (10 frames). We note that employing frames taken every 50 fs, as presented in this figure, gives equivalent results (i.e. average, root mean square fluctuation, and Gaussian fit) to the ones we obtain if we employ frames taken every 5 fs.

## 6 Basis Set Dependence of the Excitations Energies

Table S2: Basis-set dependence of the CAM-B3LYP excitations energies (eV) for Frame 4 from the **Rho-1** run. The results obtained with the default 6-31+G\* basis set used in the TDDFT excitations are shown in boldface.

| Basis set      | QM: | RPSB        |             | RPSB+Glu113 |             | M10         |
|----------------|-----|-------------|-------------|-------------|-------------|-------------|
|                | MM: | None        | Full        | None        | Full        | None        |
| 6-31G*         |     | 2.48        | 2.74        | 2.73        | 2.72        |             |
| <b>6-31+G*</b> |     | <b>2.45</b> | <b>2.70</b> | <b>2.69</b> | <b>2.71</b> | <b>2.56</b> |
| 6-31++G**      |     | 2.43        | 2.70        | 2.68        | 2.70        |             |
| cc-pVDZ        |     | 2.47        | 2.73        | 2.72        | 2.75        |             |
| cc-pVTZ        |     | 2.45        | 2.70        | 2.69        | 2.70        |             |
| ANO-L-VDZP     |     |             | 2.69        |             |             |             |

Table S3: Basis-set dependence of the CASPT2 excitations energies (eV) for Frame 4 from the **Rho-1** run. The QM/MM environment is RPSB/Full and the CAS expansion is a CAS(12,12) over 2 states. The results obtained with the default ANO-L-VDZP basis set used in the CASPT2 excitations are shown in boldface.

| Basis set                     | CASSCF      | $f$         | SS-CASPT2   | MS-CASPT2   |
|-------------------------------|-------------|-------------|-------------|-------------|
| <b>ANO-L-VDZP</b>             | <b>3.27</b> | <b>1.46</b> | <b>2.72</b> | <b>2.79</b> |
| aug-ANO-L-VDZP <sup>a,b</sup> | 3.28        | 1.46        | 2.71        | 2.78        |
| ANO-L-[4s3p1d]/[3s1p]         | 3.28        | 1.46        | 2.71        | 2.79        |
| 6-31G*                        | 3.31        | 1.45        | 2.78        | 2.85        |
| 6-31+G*                       | 3.29        | 1.45        | 2.74        | 2.80        |
| 6-31++G**                     | 3.29        | 1.45        | 2.73        | 2.79        |
| cc-pVDZ                       | 3.33        | 1.47        | 2.77        | 2.84        |

<sup>a</sup> Diffuse functions only on heavy atoms;

<sup>b</sup> Diffuse functions taken from aug-cc-pVDZ;

## 7 TDDFT Excitation Energies

Table S4: CAM-B3LYP/6-31+G\* and LC- $\omega$ PBE/6-31+G\* excitations energies (eV) and oscillator strengths for Frames 4, 7, and 11 obtained in different QM/MM environments. For the CAM-B3LYP excitation energies, we presents the difference in the dipole moments of the ground and excited states,  $|\Delta\mu|$  (D), and the CI coefficient for the HOMO $\rightarrow$ LUMO excitation (which is a  $\pi \rightarrow \pi^*$  excitation localized on the chromophore).

| QM/MM            | Frame | CAM-B3LYP |      |               |                         | LC- $\omega$ PBE |      |
|------------------|-------|-----------|------|---------------|-------------------------|------------------|------|
|                  |       | Exc.      | $f$  | $ \Delta\mu $ | HOMO $\rightarrow$ LUMO | Exc.             | $f$  |
| RPSB/None        | 4     | 2.45      | 1.32 | 6.8           | 0.69                    | 2.58             | 1.51 |
|                  | 7     | 2.42      | 1.23 | 6.7           | 0.68                    | 2.55             | 1.41 |
|                  | 11    | 2.36      | 1.23 | 6.8           | 0.69                    | 2.51             | 1.42 |
| RPSB/Full        | 4     | 2.70      | 1.51 | 5.0           | 0.70                    | 2.82             | 1.60 |
|                  | 7     | 2.63      | 1.41 | 4.7           | 0.70                    | 2.74             | 1.47 |
|                  | 11    | 2.65      | 1.41 | 6.2           | 0.69                    | 2.82             | 1.53 |
| RPSB+Glu113/None | 4     | 2.69      | 1.52 | 5.4           | 0.70                    | 2.86             | 0.96 |
|                  | 7     | 2.72      | 1.35 | 3.8           | 0.70                    | 2.84             | 1.42 |
|                  | 11    | 2.72      | 1.22 | 2.6           | 0.69                    | 2.88             | 1.57 |
| RPSB+Glu113/Full | 4     | 2.71      | 1.53 | 5.0           | 0.69                    | 2.83             | 1.60 |
|                  | 7     | 2.62      | 1.42 | 5.0           | 0.70                    | 2.74             | 1.48 |
|                  | 11    | 2.65      | 1.46 | 6.4           | 0.69                    | 2.83             | 1.58 |
| M10 cluster      | 4     | 2.56      | 1.05 |               | 0.68                    | 2.66             | 1.10 |
|                  | 7     | 2.53      | 1.00 |               | 0.69                    | 2.64             | 1.03 |
|                  | 11    | 2.61      | 1.03 |               | 0.69                    | 2.77             | 1.08 |

Table S5: CAM-B3LYP/6-31+G\* and LC- $\omega$ PBE/6-31+G\* excitations energies (eV) for Frames in the region of the ZINDO absorption maximum of the **Rho-1**, **Rho-2**, and **Rho-3** runs. We also show the excitations obtained when only the MM charges of the Glu113 counter-ion are included (RPSB/Only Glu113).

| Frame                     | QM:<br>MM: | RPSB |             |      | RPSB+Glu113 |      | M10  |
|---------------------------|------------|------|-------------|------|-------------|------|------|
|                           |            | None | Only Glu113 | Full | None        | Full | None |
| CAM-B3LYP/6-31+G*:        |            |      |             |      |             |      |      |
| Rho-1                     | 1          | 2.49 | 2.70        | 2.68 | 2.71        | 2.69 | 2.58 |
|                           | 2          | 2.31 | 2.60        | 2.58 | 2.61        | 2.59 | 2.51 |
|                           | 3          | 2.33 | 2.63        | 2.67 | 2.64        | 2.65 | 2.53 |
|                           | 4          | 2.45 | 2.68        | 2.70 | 2.69        | 2.71 | 2.56 |
|                           | 5          | 2.38 | 2.66        | 2.69 | 2.67        | 2.70 | 2.57 |
| Rho-2                     | 6          | 2.36 | 2.70        | 2.64 | 2.71        | 2.66 | 2.60 |
|                           | 7          | 2.42 | 2.68        | 2.63 | 2.72        | 2.62 | 2.53 |
|                           | 8          | 2.38 | 2.70        | 2.65 | 2.71        | 2.62 | 2.58 |
|                           | 9          | 2.38 | 2.73        | 2.63 | 2.78        | 2.66 | 2.59 |
|                           | 10         | 2.38 | 2.73        | 2.68 | 2.78        | 2.70 | 2.62 |
| Rho-3                     | 11         | 2.36 | 2.67        | 2.65 | 2.72        | 2.65 | 2.61 |
| LC- $\omega$ PBE/6-31+G*: |            |      |             |      |             |      |      |
| Rho-1                     | 1          | 2.60 | 2.85        | 2.83 | 2.87        | 2.85 |      |
|                           | 2          | 2.43 | 2.77        | 2.74 | 2.79        | 2.76 |      |
|                           | 3          | 2.51 | 2.83        | 2.84 | 2.85        | 2.83 |      |
|                           | 4          | 2.58 | 2.81        | 2.82 | 2.85        | 2.83 | 2.66 |
|                           | 5          | 2.55 | 2.88        | 2.89 | 2.90        | 2.91 |      |
| Rho-2                     | 6          | 2.53 | 2.92        | 2.82 | 2.97        | 2.86 |      |
|                           | 7          | 2.55 | 2.81        | 2.74 | 2.84        | 2.74 | 2.64 |
|                           | 8          | 2.51 | 2.91        | 2.83 | 2.98        | 2.81 |      |
|                           | 9          | 2.54 | 2.96        | 2.83 | 3.02        | 2.88 |      |
|                           | 10         | 2.54 | 2.90        | 2.86 | 2.97        | 2.90 |      |
| Rho-3                     | 11         | 2.51 | 2.84        | 2.82 | 2.88        | 2.83 | 2.77 |

## 8 TDDFT Excitation Energies for Different Chromophore Models

In the M1 to M12 cluster models used in the paper (see for example Figure 4 and 8 in the paper), the retinal chromophore model, denoted as CHRO, is extended to include most of the backbone of Lys296 and, therefore, is slightly larger than the RPSB chromophore used in the conventional QM/MM calculations throughout the paper. The extended CHRO model is cut at the C-C $_{\alpha}$  bond of Lys296 and the C $_{\alpha}$ -N bond of Ala295 while the RPSB model is cut at C $_{\gamma}$ -C $_{\delta}$  bond of Lys296.

In both cases, the cut is performed some distance away from the  $\pi$  network on the chromophore and, therefore, we do not expect a large difference in the excitations of the two chromophores models when considered in isolation or in the presence of the MM charges. To verify this, we perform CAM-B3LYP/MM calculations using the CHRO chromophore model and, in Table S6, compare these excitation energies to the results obtained with RPSB chromophore model. We observe that without the MM charges (MM None), the difference in the excitations energies between the two chromophore models is 0.03-0.04 eV. Once we include the MM charges (MM Full), the difference is even less or no more than 0.02 eV. Therefore, the two chromophore models yield almost identical excitation energies.

Table S6: CAM-B3LYP/6-31+G\* excitations energies (eV) obtained with the two different chromophore models employed in the paper. The RPSB model is used in the conventional QM/MM calculations while the CHRO model is used in the M1 to M12 cluster models. Compared to the RPSB model, the CHRO model is slightly larger since it is extended to include the backbone of Lys296. Note, that for CHRO+Glu113 calculations, we do not include in QM region the 7 waters that are instead included in the M2 cluster presented in Figures 4 and 8.

| CHRO chromophore model |     |      |      |             |      |
|------------------------|-----|------|------|-------------|------|
|                        | QM: | CHRO |      | CHRO+Glu113 |      |
|                        | MM: | None | Full | None        | Full |
| Frame 4                |     | 2.42 | 2.69 | 2.65        | 2.70 |
| Frame 7                |     | 2.38 | 2.62 | 2.69        | 2.60 |

  

| RPSB chromophore model |     |      |      |             |      |
|------------------------|-----|------|------|-------------|------|
|                        | QM: | RPSB |      | RPSB+Glu113 |      |
|                        | MM: | None | Full | None        | Full |
| Frame 4                |     | 2.45 | 2.71 | 2.69        | 2.71 |
| Frame 7                |     | 2.42 | 2.63 | 2.72        | 2.62 |

## 9 CASPT2 Excitation energies

### Selection of the Active Space

In Table S7, we present single-state (SS) and multi-state (MS) CASPT2 excitations for Frames 4, 7, and 11 obtained using different SA-CASSCF zero-order wave functions. In Table S7, we underline the CASPT2 excitations which are presented in Table 3 in the paper. In the state average calculations, we employ equal weights over either the two ( $S_0$  and  $S_1$ ) or three ( $S_0$ ,  $S_1$ , and  $S_2$ ) lowest-energy states. In general, it has been shown that a minimal CAS space might not always be sufficient<sup>S10,S45–S47</sup> and, therefore, the convergence of the excitation energies must be assessed by including additional virtual orbitals in the active space. To achieve this, we perform calculations with the minimal CAS(12,12) active space (all 12  $\pi$  electrons in the reference and the same number of active  $\pi$  orbitals) and also with active spaces that include additional  $\pi$  orbitals up to a CAS(12,15) expansion.

For the two-state calculations, the CASSCF excitations decrease by about 0.05 eV when going from the minimal CAS(12,12) active space to the CAS(12,13) active space, which additionally includes the  $\pi$  orbital shown in Figure S13(h). Enlarging the active space further up to a CAS(12,15) leaves the CASSCF excitation energies unchanged. The CASPT2 excitations are less sensitive than the CASSCF ones and there is at most a 0.02 eV difference between values obtained with the CAS(12,12) and CAS(12,13) expansions.

The three-state calculations are more sensitive to the choice of active space especially in the RPSB/Full case: The CASSCF and CASSCF excitation energies decrease by as much as 0.2 and 0.1 eV, respectively, when going from a CAS(12,12) to a CAS(12,13) active space. As in the two-state calculations, further enlarging the active space has almost no effect. The reason for the increased sensitivity of the three-state calculations is that the two excited states  $S_1$  and  $S_2$  are rather close in energy and need to be simultaneously well described by the same CAS expansion. The use of the CAS(12,13) active space lowers the CASSCF excitation energy of the relevant bright state (as compared to the CAS(12,12) active space), improving its description, and yields better CASPT2 excitations. We also observe that for the CAS(12,13) active space, the difference between the two- and three-state CASPT2 excitations is less than for the CAS(12,12) active space.

In summary, we find that the CAS(12,13) is the smallest active space to yield converged CASSCF and CASPT2 excitations and that the two-state and three-state calculations are rather comparable when this active space is employed. We observe a similar behavior for the NEVPT2 excitation presented in Table S8. In the two-state calculations, the NEVPT2 excitations increase by about 0.05 eV when going from a CAS(12,12) to a CAS(12,13) expansion. Consequently, in the paper, we present the single-state CASPT2 and NEVPT2 excitations obtained with the CAS(12,13) and use two states in the state-average calculation.

Table S7: CASSCF and CASPT2 excitation energies (eV) on Frames 4, 7, and 11 obtained with the RPSB QM region and different SA-CASSCF wave functions. We underline the CASPT2 excitation energies presented in Table 3 in the paper. The excitations are obtained either without (None) or with (Full) MM charges. We indicate the number of states (St.) and the active space (CAS) used in the SA-CASSCF wave function. We also present the oscillator strengths  $f$  and the difference between the ground-state and excited-state dipole moments  $|\Delta\mu|$  (D). The S-IPEA Hamiltonian and the ANO-L-VDZP basis set are employed. We use a constant imaginary level shift of 0.1 a.u. In all CASPT2 calculations, we find that the reference weights of the states under consideration are similar and that there are no intruder states.

| QM / MM        | Fr. | St. / CAS   | CASSCF      | $f^a$       | $ \Delta\mu ^a$ | SS-CASPT2         | MS-CASPT2         |
|----------------|-----|-------------|-------------|-------------|-----------------|-------------------|-------------------|
| RPSB<br>/ None | 4   | 2 / (12,12) | 2.65        | 1.50        | 12.9            | 2.30              | 2.36              |
|                |     | (12,13)     | 2.62        | 1.51        | 12.6            | <b>2.29</b>       | 2.35              |
|                |     | 3 / (12,12) | 2.77 / 3.64 | 1.46 / 0.06 | 14.6 / 0.9      | 2.23 / 3.36       | 2.42 / 3.47       |
|                |     | (12,13)     | 2.66 / 3.63 | 1.50 / 0.07 | 13.7 / 1.5      | 2.26 / 3.34       | 2.38 / 3.41       |
|                | 7   | 2 / (12,12) | 2.54        | 1.45        | 12.0            | 2.23              | 2.30              |
|                |     | (12,13)     | 2.51        | 1.47        | 11.9            | <b>2.22</b>       | 2.30              |
|                |     | 3 / (12,12) | 2.67 / 3.56 | 1.41 / 0.02 | 14.1 / 1.0      | 2.15 / 3.25       | 2.40 / 3.38       |
|                |     | (12,13)     | 2.56 / 3.54 | 1.45 / 0.03 | 13.3 / 1.1      | 2.19 / 3.23       | 2.35 / 3.31       |
|                | 11  | 2 / (12,12) | 2.54        | 1.44        | 13.5            | 2.19              | 2.26              |
|                |     | (12,13)     | 2.51        | 1.45        | 13.3            | <b>2.17</b>       | 2.25              |
|                |     | 3 / (12,12) | 2.65 / 3.59 | 1.39 / 0.08 | 15.1 / 1.4      | 2.13 / 3.26       | 2.32 / 3.36       |
|                |     | (12,13)     | 2.54 / 3.57 | 1.43 / 0.09 | 14.4 / 2.1      | 2.16 / 3.24       | 2.29 / 3.31       |
| RPSB<br>/ Full | 4   | 2 / (12,12) | 3.27        | 1.46        | 12.9            | 2.72              | 2.79              |
|                |     | (12,13)     | 3.22        | 1.47        | 12.8            | <b>2.71</b>       | 2.78              |
|                |     | (12,14)     | 3.21        | 1.46        | 12.7            | 2.71              | 2.78              |
|                |     | (12,15)     | 3.19        | 1.47        |                 |                   |                   |
|                |     | (12,13)     | 3.22        | 1.47        | 12.8            | 2.38 <sup>b</sup> | 2.50 <sup>b</sup> |
|                |     | 3 / (12,12) | 3.52 / 3.59 | 1.37 / 0.10 | 13.6 / 1.0      | 2.62 / 3.38       | 2.70 / 3.60       |
|                |     | (12,13)     | 3.35 / 3.59 | 1.45 / 0.05 | 13.4 / 1.1      | 2.67 / 3.38       | 2.76 / 3.49       |
|                |     | (12,14)     | 3.33 / 3.59 | 1.45 / 0.05 | 13.2 / 1.1      | 2.68 / 3.37       | 2.76 / 3.46       |
|                |     | (12,15)     | 3.32 / 3.60 | 1.45 / 0.05 | 13.1 / 1.1      |                   |                   |
|                | 7   | 2 / (12,12) | 3.14        | 1.40        | 12.5            | 2.62              | 2.74              |
|                |     | (12,13)     | 3.08        | 1.43        | 12.5            | <b>2.61</b>       | 2.72              |
|                |     | (12,13)     | 3.08        | 1.43        | 12.5            | 2.31 <sup>b</sup> | 2.49 <sup>b</sup> |
|                |     | 3 / (12,12) | 3.40 / 3.50 | 1.06 / 0.29 | 10.1 / 3.4      | 2.68 / 2.98       | 2.66 / 3.65       |
|                |     | (12,13)     | 3.21 / 3.48 | 1.39 / 0.01 | 13.5 / 1.2      | 2.57 / 3.23       | 2.79 / 3.36       |
|                |     | (12,14)     | 3.19 / 3.49 | 1.39 / 0.01 | 13.3 / 1.2      | 2.56 / 3.22       | 2.76 / 3.34       |
|                | 11  | 2 / (12,12) | 3.38        | 1.37        | 13.7            | 2.72              | 2.80              |
|                |     | (12,13)     | 3.32        | 1.40        | 13.7            | <b>2.72</b>       | 2.81              |
|                |     | (12,13)     | 3.32        | 1.40        | 13.7            | 2.40 <sup>b</sup> | 2.55 <sup>b</sup> |
|                |     | 3 / (12,12) | 3.53 / 3.66 | 0.02 / 1.38 | 0.6 / 13.8      | 3.23 / 2.72       | 2.93 / 3.49       |
|                |     | (12,13)     | 3.45 / 3.54 | 1.12 / 0.32 | 12.1 / 1.4      | 2.74 / 3.25       | 2.61 / 3.60       |
|                |     | (12,14)     | 3.43 / 3.54 | 1.17 / 0.26 | 12.5 / 1.0      | 2.72 / 3.26       | 2.63 / 3.55       |

<sup>a</sup> Obtained in a CASSCF calculation;

<sup>b</sup> Obtained with the 0-IPEA zero-order Hamiltonian

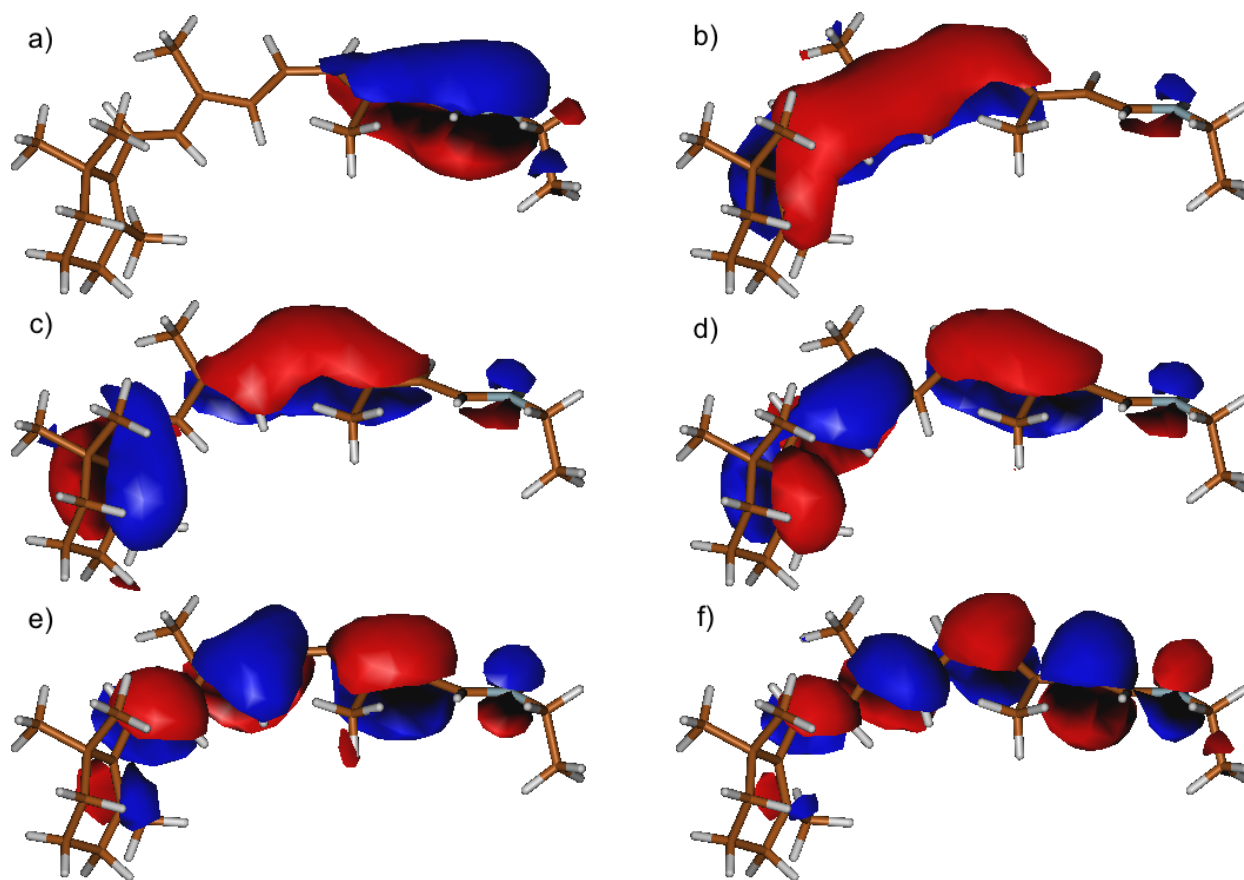

Figure S12: Orbitals in the CAS(12,13) active space. The first six orbitals doubly occupied in the Hartree-Fock determinant are shown.



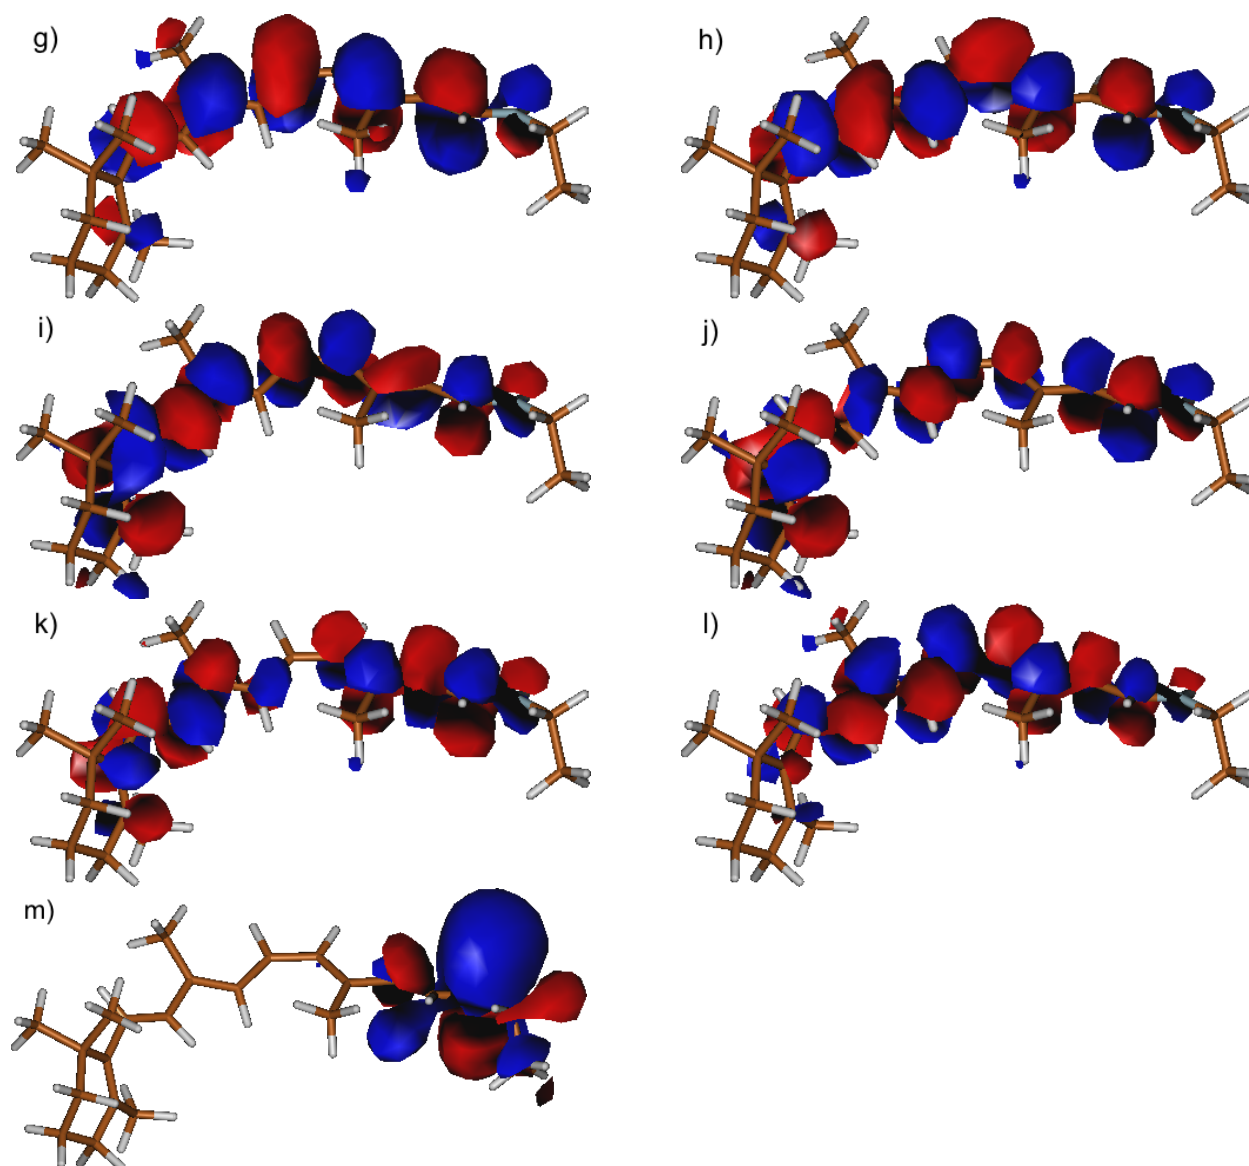

Figure S13: Orbitals in the CAS(12,13) active space. The seven virtual orbitals not occupied in the Hartree-Fock determinant are shown.

## 10 NEVPT2 Excitation Energies

It has been noted that the NEVPT2 approach can be rather sensitive to the quality of the CASSCF zero-order wave function and give unsatisfactory performance if the correction due to dynamical correlation is large.<sup>S47</sup> To investigate this aspect, we present in Table S8 the NEVPT2 excitations for Frames 4, 7, and 11 obtained with different SA-CASSCF zero-order wave functions. We observe that, for the excitation energies obtained using two states, the correction due to dynamical correlation is always less than 0.7 eV. Furthermore, the difference between the excitation energies obtained with a CAS(12,12) and a CAS(12,13) is less than 0.05 eV, which indicates that the NEVPT2 excitation energies are robust and can be trusted. However, the performance when employing three states is less satisfactory, with larger corrections and considerable differences between the results obtained with the two active spaces. Therefore, as for CASPT2 calculations, we present in Table 3 in the paper, the NEVPT2 excitations obtained using CAS(12,13) over two states which, as explained, are reliable.

Table S8: NEVPT2/SC excitation energies (eV) on Frames 4, 7, and 11 obtained with the RPSB QM region and different SA-CASSCF wave functions. We underline the NEVPT2 excitation presented in Table 3 in the paper. The excitation energies are obtained either without (None) or with (Full) MM charges. We indicate the number of states (St.) and the active space (CAS) used in the SA-CASSCF wave function. We also present the oscillator strengths  $f$ . The ANO-L-VDZP basis set is employed.

| QM / MM     | Fr. | St. / CAS   | CASSCF      | $f^a$       | NEVPT2/SC          |
|-------------|-----|-------------|-------------|-------------|--------------------|
| RPSB / None | 4   | 2 / (12,12) | 2.65        | 1.50        | 2.37               |
|             |     | (12,13)     | 2.62        | 1.51        | <b><u>2.39</u></b> |
|             |     | 3 / (12,12) | 2.77 / 3.65 | 1.46 / 0.06 | 2.23 / 3.34        |
|             |     | (12,13)     | 2.66 / 3.63 | 1.50 / 0.07 | 2.33 / 3.34        |
|             | 7   | 2 / (12,12) | 2.54        | 1.45        | 2.33               |
|             |     | (12,13)     | 2.51        | 1.47        | <b><u>2.35</u></b> |
|             |     | 3 / (12,12) | 2.66 / 3.56 | 1.41 / 0.02 | 2.17 / 3.25        |
|             |     | (12,13)     | 2.56 / 3.54 | 1.45 / 0.03 | 2.27 / 3.25        |
|             | 11  | 2 / (12,12) | 2.54        | 1.44        | 2.26               |
|             |     | (12,13)     | 2.51        | 1.45        | <b><u>2.28</u></b> |
|             |     | 3 / (12,12) | 2.64 / 3.59 | 1.40 / 0.08 | 2.14 / 3.22        |
|             |     | (12,13)     | 2.54 / 3.57 | 1.43 / 0.09 | 2.22 / 3.22        |
| RPSB / Full | 4   | 2 / (12,12) | 3.25        | 1.39        | 2.73               |
|             |     | (12,13)     | 3.21        | 1.48        | <b><u>2.76</u></b> |
|             |     | 3 / (12,12) | 3.51 / 3.58 | 1.39 / 0.08 | 2.51 / 3.41        |
|             |     | (12,13)     | 3.34 / 3.58 | 1.46 / 0.05 | 2.66 / 3.41        |
|             | 7   | 2 / (12,12) | 3.13        | 1.40        | 2.60               |
|             |     | (12,13)     | 3.07        | 1.43        | <b><u>2.65</u></b> |
|             |     | 3 / (12,12) | 3.39 / 3.48 | 0.94 / 0.41 | 2.69 / 2.92        |
|             |     | (12,13)     | 3.20 / 3.46 | 1.39 / 0.01 | 2.55 / 3.28        |
|             | 11  | 2 / (12,12) | 3.37        | 1.40        | 2.70               |
|             |     | (12,13)     | 3.32        | 1.41        | <b><u>2.74</u></b> |
|             |     | 3 / (12,12) | 3.51 / 3.66 | 0.01 / 1.39 | 3.30 / 2.51        |
|             |     | (12,13)     | 3.44 / 3.52 | 1.10 / 0.34 | 2.69 / 3.30        |

<sup>a</sup> Obtained in a CASSCF calculation

# 11 Calculations for the "Comparison with Previous CASPT2/MM and Other Studies" section

Table S9: CASPT2/MM excitation energies (eV) computed with the rhodopsin (1U19) CASSCF/Amber model used in Refs. S33 and S34. The relevant bright state is underlined. We note that Glu181 is protonated in this model. The excitations are obtained using different zero-order Hamiltonians (S-IPEA or 0-IPEA) and basis sets (ANO-L-VDZP or 6-31G\*). The calculations are performed using a CAS(12,12) expansion, a SA-CASSCF wave functions optimized over 3 states with equal weights, and a constant imaginary level shift of 0.1 a.u. In all CASPT2 calculations, we find that the reference weights of the states under consideration are similar and that there are no intruder states.

| IPEA   | Basis set  | CASSCF      | $f$         | SS-CASPT2          |
|--------|------------|-------------|-------------|--------------------|
| 0-IPEA | 6-31G*     | 3.70 / 4.50 | 0.94 / 0.41 | <u>2.38</u> / 3.62 |
|        | ANO-L-VDZP | 3.66 / 4.49 | 0.97 / 0.39 | <u>2.22</u> / 3.51 |
| S-IPEA | 6-31G*     | 3.70 / 4.50 | 0.94 / 0.41 | <u>2.75</u> / 4.02 |
|        | ANO-L-VDZP | 3.66 / 4.49 | 0.97 / 0.39 | <u>2.63</u> / 3.96 |

Table S10: CASPT2/MM excitations (eV) obtained from different rhodopsin (1U19) models. The relevant bright state is underlined. Only the chromophore is optimized with either CASSCF or BLYP, using the protonation state of Glu181 as indicated. We employ the ANO-L-VDZP basis set and the S-IPEA Hamiltonian. The calculations are performed using a CAS(12,12) expansion, a SA-CASSCF wave functions optimized over 3 states with equal weights, and a constant imaginary level shift of 0.1 a.u. In all CASPT2 calculations, we find that the reference weights of the states under consideration are similar and that there are no intruder states.

| Residue protonations   | Chro. Opt. | Glu181     | CASSCF      | $f$         | SS-CASPT2                       |
|------------------------|------------|------------|-------------|-------------|---------------------------------|
| From Refs. S33 and S34 | CASSCF     | Prot.      | 3.66 / 4.49 | 0.97 / 0.39 | <u>2.63</u> / 3.96              |
|                        | CASSCF     | Deprot.    | 3.89 / 4.56 | 0.93 / 0.46 | <u>2.96</u> / 4.02              |
|                        | BLYP       | Prot.      | 2.95 / 3.34 | 1.56 / 0.02 | <u>2.17</u> / 3.18              |
|                        | BLYP       | Deprot.    | 3.31 / 3.47 | 1.27 / 0.28 | <u>2.55</u> / 3.20              |
| As in this study       | CASSCF     | Deprot.    | 4.04 / 4.55 | 0.65 / 0.79 | <u>3.14</u> <sup>a</sup> / 3.76 |
|                        |            | CAS(12,13) | 3.88 / 4.46 | 0.92 / 0.54 | 3.07 / 4.21                     |
|                        |            | CAS(12,14) | 3.85 / 4.46 | 0.96 / 0.50 | 3.06 / 3.94                     |
|                        | BLYP       | Deprot.    | 3.34 / 3.56 | 0.00 / 1.55 | 3.16 / <u>2.57</u>              |

<sup>a</sup> For this case, the second and third states have rather similar oscillator strengths, so the assignment of the bright state is ambiguous. Therefore, to clarify this issue, we perform calculations with larger CAS(12,13) and CAS(12,14) expansions, where additional virtual  $\pi$  orbitals are included. As the CAS increases, the oscillator strength of the second state increases and this state becomes unambiguously the bright state, with an excitation energy of 3.07 eV, that is, rather close to the value of 3.14 eV obtained for the CAS(12,12) expansion. Thus, we assign the second state to be the relevant bright state for all the CAS expansions.

Table S11: CASPT2/MM excitations (eV) obtained using two of the models presented in Table S10. For each model, the geometry of the chromophore is the same as the one relaxed in the presence of the full protein environment (as in Table S10), while the excitations are computed using different MM charges. We employ the ANO-L-VDZP basis set and the S-IPEA Hamiltonian. The calculations are performed using a CAS(12,12) expansion, a SA-CASSCF wave functions optimized over 3 states with equal weights, and a constant imaginary level shift of 0.1 a.u. In all CASPT2 calculations, we find that the reference weights of the states under consideration are similar and that there are no intruder states. We underline the relevant bright state.

| Rhodopsin Model / Glu181 / Geo. Opt. | MM charges | CASSCF      | $f$         | SS-CASPT2          |
|--------------------------------------|------------|-------------|-------------|--------------------|
| Refs. S33, S34 / Prot. / CASSCF      | None       | 3.16 / 4.37 | 1.12 / 0.30 | <u>2.46</u> / 3.86 |
|                                      | Glu113     | 4.31 / 4.97 | 0.13 / 1.25 | 3.70 / <u>3.56</u> |
|                                      | Full       | 3.66 / 4.49 | 0.97 / 0.39 | <u>2.63</u> / 3.96 |
| From present work / Deprot. / BLYP   | None       | 2.72 / 3.37 | 1.58 / 0.04 | <u>2.11</u> / 3.15 |
|                                      | Glu113     | 3.28 / 3.57 | 0.00 / 1.53 | 3.12 / <u>2.65</u> |
|                                      | Full       | 3.34 / 3.56 | 0.00 / 1.55 | 3.16 / <u>2.57</u> |

## 12 Geometries for the RPSB+Glu113 QM region

Table S12: Coordinates (Å) for Frame 1 from the **Rho-1** run. The coordinates are for the RPSB+Glu113 QM region employed in the excited-state calculations.

|   |        |        |        |
|---|--------|--------|--------|
| C | 11.453 | 4.665  | 4.296  |
| H | 11.336 | 3.666  | 3.792  |
| H | 11.318 | 5.335  | 3.492  |
| C | 12.945 | 4.767  | 4.651  |
| H | 13.212 | 4.167  | 5.496  |
| H | 13.576 | 4.579  | 3.758  |
| C | 13.294 | 6.233  | 5.048  |
| O | 13.031 | 7.135  | 4.252  |
| O | 14.069 | 6.468  | 5.955  |
| C | 17.743 | 8.722  | 8.794  |
| H | 18.863 | 8.651  | 8.983  |
| H | 17.401 | 7.819  | 9.343  |
| C | 17.430 | 8.731  | 7.311  |
| H | 18.043 | 9.565  | 6.810  |
| H | 17.777 | 7.825  | 6.700  |
| N | 16.033 | 8.913  | 6.976  |
| H | 15.536 | 8.017  | 6.750  |
| C | 8.562  | 18.066 | 8.504  |
| C | 8.291  | 19.215 | 9.548  |
| C | 9.228  | 19.054 | 10.796 |
| C | 8.688  | 17.793 | 11.487 |
| C | 8.614  | 16.609 | 10.561 |
| C | 8.580  | 16.704 | 9.229  |
| C | 8.475  | 15.588 | 8.302  |
| C | 9.244  | 14.450 | 8.262  |
| C | 9.371  | 13.448 | 7.236  |
| C | 10.545 | 12.670 | 7.189  |
| C | 10.702 | 11.623 | 6.298  |
| C | 11.732 | 10.765 | 6.120  |
| C | 13.094 | 10.936 | 6.485  |
| C | 14.011 | 9.924  | 6.462  |
| C | 15.379 | 10.022 | 6.693  |
| C | 7.497  | 18.211 | 7.350  |
| C | 9.905  | 18.366 | 7.695  |
| C | 8.410  | 15.319 | 11.244 |
| C | 8.320  | 13.312 | 6.175  |
| C | 13.458 | 12.321 | 6.866  |
| H | 7.673  | 19.080 | 6.766  |
| H | 6.538  | 18.083 | 7.710  |
| H | 7.532  | 17.429 | 6.550  |
| H | 10.795 | 18.542 | 8.344  |
| H | 9.832  | 19.242 | 7.020  |
| H | 10.220 | 17.505 | 7.162  |
| H | 7.306  | 19.274 | 10.006 |
| H | 8.518  | 20.147 | 9.093  |
| H | 9.211  | 19.869 | 11.497 |
| H | 10.297 | 18.795 | 10.489 |
| H | 7.644  | 17.892 | 11.895 |
| H | 9.362  | 17.604 | 12.384 |
| H | 8.264  | 14.455 | 10.556 |

Continued on next page

Table S12 – Continued from previous page

|                |        |        |        |
|----------------|--------|--------|--------|
| H              | 7.424  | 15.385 | 11.815 |
| H              | 9.337  | 15.063 | 11.871 |
| H              | 7.727  | 15.766 | 7.556  |
| H              | 9.978  | 14.337 | 9.084  |
| H              | 7.863  | 14.252 | 6.017  |
| H              | 7.530  | 12.662 | 6.545  |
| H              | 8.698  | 13.009 | 5.188  |
| H              | 11.276 | 12.956 | 7.937  |
| H              | 9.901  | 11.265 | 5.766  |
| H              | 11.527 | 9.836  | 5.662  |
| H              | 13.443 | 12.287 | 7.995  |
| H              | 14.436 | 12.628 | 6.641  |
| H              | 12.744 | 13.090 | 6.567  |
| H              | 13.727 | 8.864  | 6.187  |
| H              | 16.037 | 10.913 | 6.746  |
| H <sup>a</sup> | 10.684 | 4.613  | 5.066  |
| H <sup>a</sup> | 17.370 | 9.579  | 9.355  |

<sup>a</sup> Hydrogen capping atoms at the QM/MM boundry.



Table S13: Coordinates (Å) for Frame 2 from the **Rho-1** run. The coordinates are for the RPSB+Glu113 QM region employed in the excited-state calculations.

|   |        |        |        |
|---|--------|--------|--------|
| C | 12.007 | 4.633  | 4.487  |
| H | 12.133 | 3.679  | 3.990  |
| H | 11.744 | 5.351  | 3.682  |
| C | 13.441 | 4.828  | 5.068  |
| H | 13.583 | 4.160  | 5.866  |
| H | 14.040 | 4.622  | 4.179  |
| C | 13.724 | 6.297  | 5.487  |
| O | 13.516 | 7.302  | 4.852  |
| O | 14.357 | 6.361  | 6.558  |
| C | 17.901 | 8.861  | 8.947  |
| H | 18.999 | 8.828  | 9.155  |
| H | 17.526 | 7.965  | 9.394  |
| C | 17.601 | 8.912  | 7.494  |
| H | 17.925 | 9.950  | 7.078  |
| H | 18.195 | 8.166  | 6.916  |
| N | 16.167 | 8.820  | 7.142  |
| H | 15.709 | 7.886  | 7.005  |
| C | 8.488  | 18.087 | 8.352  |
| C | 8.125  | 19.206 | 9.400  |
| C | 9.108  | 19.071 | 10.610 |
| C | 8.764  | 17.830 | 11.405 |
| C | 8.479  | 16.641 | 10.507 |
| C | 8.592  | 16.716 | 9.155  |
| C | 8.707  | 15.643 | 8.189  |
| C | 9.336  | 14.379 | 8.308  |
| C | 9.498  | 13.431 | 7.183  |
| C | 10.642 | 12.614 | 7.230  |
| C | 10.832 | 11.465 | 6.421  |
| C | 11.953 | 10.648 | 6.371  |
| C | 13.279 | 10.988 | 6.735  |
| C | 14.107 | 9.882  | 6.768  |
| C | 15.421 | 9.927  | 7.106  |
| C | 7.368  | 18.033 | 7.303  |
| C | 9.793  | 18.434 | 7.726  |
| C | 8.308  | 15.423 | 11.298 |
| C | 8.370  | 13.241 | 6.216  |
| C | 13.732 | 12.353 | 7.103  |
| H | 7.226  | 19.075 | 6.824  |
| H | 6.401  | 17.693 | 7.828  |
| H | 7.627  | 17.344 | 6.481  |
| H | 10.633 | 18.324 | 8.389  |
| H | 9.821  | 19.437 | 7.341  |
| H | 9.938  | 17.832 | 6.823  |
| H | 7.028  | 19.299 | 9.697  |
| H | 8.455  | 20.133 | 8.873  |
| H | 9.302  | 20.021 | 11.122 |
| H | 10.109 | 18.955 | 10.176 |
| H | 7.950  | 17.970 | 12.180 |
| H | 9.553  | 17.540 | 12.045 |
| H | 7.860  | 14.607 | 10.759 |
| H | 7.636  | 15.673 | 12.194 |
| H | 9.252  | 15.150 | 11.761 |
| H | 8.545  | 15.879 | 7.167  |

Continued on next page

Table S13 – Continued from previous page

|                |        |        |       |
|----------------|--------|--------|-------|
| H              | 9.787  | 14.057 | 9.245 |
| H              | 7.946  | 14.215 | 5.954 |
| H              | 7.528  | 12.640 | 6.555 |
| H              | 8.654  | 12.765 | 5.270 |
| H              | 11.432 | 12.804 | 8.002 |
| H              | 9.945  | 10.982 | 6.036 |
| H              | 11.794 | 9.759  | 5.790 |
| H              | 13.199 | 13.061 | 6.453 |
| H              | 13.607 | 12.510 | 8.141 |
| H              | 14.734 | 12.598 | 6.679 |
| H              | 13.724 | 8.922  | 6.463 |
| H              | 15.802 | 10.845 | 7.472 |
| H <sup>a</sup> | 11.207 | 4.585  | 5.225 |
| H <sup>a</sup> | 17.477 | 9.709  | 9.485 |

<sup>a</sup> Hydrogen capping atoms at the QM/MM boundry.

Table S14: Cooridantes (Å) for Frame 3 from the **Rho-1** run. The coordinates are for the RPSB+Glu113 QM region employed in the excited-state calculations.

|   |        |        |        |
|---|--------|--------|--------|
| C | 11.938 | 4.706  | 4.257  |
| H | 11.997 | 3.704  | 3.789  |
| H | 11.708 | 5.403  | 3.467  |
| C | 13.331 | 4.913  | 4.897  |
| H | 13.470 | 4.223  | 5.697  |
| H | 14.085 | 4.638  | 4.194  |
| C | 13.734 | 6.304  | 5.347  |
| O | 13.263 | 7.235  | 4.739  |
| O | 14.515 | 6.344  | 6.286  |
| C | 18.117 | 8.972  | 9.359  |
| H | 19.169 | 9.243  | 9.523  |
| H | 17.884 | 7.988  | 9.816  |
| C | 17.827 | 9.023  | 7.859  |
| H | 18.223 | 9.836  | 7.274  |
| H | 18.376 | 8.205  | 7.429  |
| N | 16.389 | 8.924  | 7.484  |
| H | 15.981 | 8.005  | 7.288  |
| C | 8.235  | 18.012 | 8.728  |
| C | 8.020  | 19.096 | 9.885  |
| C | 9.121  | 18.938 | 10.875 |
| C | 8.784  | 17.647 | 11.727 |
| C | 8.462  | 16.509 | 10.831 |
| C | 8.354  | 16.662 | 9.437  |
| C | 8.468  | 15.528 | 8.573  |
| C | 9.322  | 14.467 | 8.555  |
| C | 9.419  | 13.408 | 7.574  |
| C | 10.558 | 12.596 | 7.716  |
| C | 10.929 | 11.536 | 6.843  |
| C | 12.053 | 10.807 | 6.902  |
| C | 13.352 | 10.998 | 7.461  |
| C | 14.212 | 9.933  | 7.207  |
| C | 15.583 | 9.996  | 7.466  |
| C | 7.154  | 18.039 | 7.716  |
| C | 9.561  | 18.194 | 7.982  |
| C | 8.365  | 15.145 | 11.494 |
| C | 8.255  | 13.219 | 6.588  |
| C | 13.800 | 12.240 | 8.120  |
| H | 6.732  | 19.019 | 7.428  |
| H | 6.232  | 17.484 | 8.053  |
| H | 7.391  | 17.514 | 6.799  |
| H | 10.402 | 18.054 | 8.615  |
| H | 9.564  | 19.199 | 7.460  |
| H | 9.626  | 17.428 | 7.253  |
| H | 7.044  | 19.021 | 10.403 |
| H | 8.015  | 20.109 | 9.459  |
| H | 9.020  | 19.688 | 11.734 |
| H | 10.113 | 18.942 | 10.398 |
| H | 7.866  | 17.904 | 12.260 |
| H | 9.636  | 17.436 | 12.409 |
| H | 7.873  | 14.438 | 10.827 |
| H | 7.731  | 15.228 | 12.404 |
| H | 9.415  | 14.816 | 11.811 |
| H | 7.820  | 15.489 | 7.678  |

Continued on next page

Table S14 – Continued from previous page

|                |        |        |        |
|----------------|--------|--------|--------|
| H              | 9.953  | 14.386 | 9.463  |
| H              | 8.232  | 14.151 | 6.061  |
| H              | 7.320  | 13.106 | 7.149  |
| H              | 8.373  | 12.358 | 5.935  |
| H              | 11.300 | 12.948 | 8.455  |
| H              | 10.237 | 11.269 | 6.025  |
| H              | 11.966 | 9.937  | 6.218  |
| H              | 14.897 | 12.543 | 8.085  |
| H              | 13.276 | 13.129 | 7.723  |
| H              | 13.649 | 12.112 | 9.181  |
| H              | 13.846 | 8.971  | 6.774  |
| H              | 16.138 | 10.917 | 7.711  |
| H <sup>a</sup> | 11.224 | 4.707  | 5.081  |
| H <sup>a</sup> | 17.603 | 9.681  | 10.008 |

<sup>a</sup> Hydrogen capping atoms at the QM/MM boundry.

Table S15: Cooridantes (Å) for Frame 4 from the **Rho-1** run. The coordinates are for the RPSB+Glu113 QM region employed in the excited-state calculations.

|   |        |        |        |
|---|--------|--------|--------|
| C | 11.848 | 4.731  | 4.412  |
| H | 11.887 | 3.641  | 4.205  |
| H | 11.740 | 5.298  | 3.437  |
| C | 13.217 | 5.072  | 5.108  |
| H | 13.191 | 4.607  | 6.095  |
| H | 14.018 | 4.547  | 4.527  |
| C | 13.505 | 6.541  | 5.238  |
| O | 12.961 | 7.334  | 4.430  |
| O | 14.363 | 6.872  | 6.112  |
| C | 18.059 | 9.191  | 9.062  |
| H | 19.210 | 9.190  | 9.204  |
| H | 17.754 | 8.239  | 9.488  |
| C | 17.848 | 9.312  | 7.544  |
| H | 18.216 | 10.357 | 7.229  |
| H | 18.478 | 8.602  | 6.964  |
| N | 16.474 | 9.226  | 7.078  |
| H | 15.974 | 8.328  | 6.994  |
| C | 8.358  | 18.065 | 8.578  |
| C | 8.336  | 19.238 | 9.519  |
| C | 9.156  | 19.154 | 10.799 |
| C | 8.691  | 17.976 | 11.643 |
| C | 8.421  | 16.781 | 10.763 |
| C | 8.278  | 16.759 | 9.404  |
| C | 8.404  | 15.572 | 8.604  |
| C | 9.399  | 14.626 | 8.621  |
| C | 9.605  | 13.620 | 7.602  |
| C | 10.768 | 12.886 | 7.567  |
| C | 10.968 | 11.849 | 6.608  |
| C | 12.122 | 11.064 | 6.400  |
| C | 13.442 | 11.233 | 6.801  |
| C | 14.292 | 10.135 | 6.867  |
| C | 15.659 | 10.296 | 6.993  |
| C | 7.090  | 18.102 | 7.671  |
| C | 9.621  | 18.141 | 7.788  |
| C | 8.292  | 15.509 | 11.690 |
| C | 8.440  | 13.354 | 6.669  |
| C | 14.006 | 12.662 | 6.916  |
| H | 7.057  | 19.041 | 7.207  |
| H | 6.191  | 17.989 | 8.255  |
| H | 7.102  | 17.256 | 6.948  |
| H | 10.526 | 18.019 | 8.449  |
| H | 9.536  | 19.119 | 7.294  |
| H | 9.620  | 17.291 | 7.037  |
| H | 7.284  | 19.409 | 9.796  |
| H | 8.575  | 20.171 | 9.003  |
| H | 9.017  | 20.146 | 11.262 |
| H | 10.184 | 19.098 | 10.551 |
| H | 7.972  | 18.065 | 12.418 |
| H | 9.545  | 17.696 | 12.221 |
| H | 8.135  | 14.603 | 11.171 |
| H | 7.527  | 15.765 | 12.439 |
| H | 9.288  | 15.311 | 12.196 |
| H | 7.631  | 15.492 | 7.786  |

Continued on next page

Table S15 – Continued from previous page

|                |        |        |       |
|----------------|--------|--------|-------|
| H              | 10.139 | 14.788 | 9.410 |
| H              | 8.095  | 14.370 | 6.310 |
| H              | 7.607  | 13.040 | 7.277 |
| H              | 8.577  | 12.540 | 5.951 |
| H              | 11.569 | 13.060 | 8.293 |
| H              | 10.148 | 11.584 | 5.994 |
| H              | 11.866 | 10.264 | 5.719 |
| H              | 14.628 | 12.775 | 7.871 |
| H              | 14.614 | 12.820 | 6.009 |
| H              | 13.209 | 13.377 | 6.904 |
| H              | 13.906 | 9.088  | 6.793 |
| H              | 16.140 | 11.261 | 6.936 |
| H <sup>a</sup> | 11.012 | 4.750  | 5.111 |
| H <sup>a</sup> | 17.628 | 9.971  | 9.690 |

<sup>a</sup> Hydrogen capping atoms at the QM/MM boundry.

Table S16: Cooridantes (Å) for Frame 5 from the **Rho-1** run. The coordinates are for the RPSB+Glu113 QM region employed in the excited-state calculations.

|   |        |        |        |
|---|--------|--------|--------|
| C | 12.201 | 4.604  | 4.357  |
| H | 12.231 | 3.556  | 4.162  |
| H | 12.096 | 5.061  | 3.432  |
| C | 13.561 | 5.009  | 4.930  |
| H | 13.680 | 4.516  | 5.880  |
| H | 14.335 | 4.658  | 4.247  |
| C | 13.634 | 6.547  | 5.200  |
| O | 13.335 | 7.283  | 4.213  |
| O | 14.295 | 6.951  | 6.150  |
| C | 17.959 | 9.072  | 8.859  |
| H | 18.997 | 8.987  | 8.999  |
| H | 17.447 | 8.107  | 9.010  |
| C | 17.802 | 9.350  | 7.325  |
| H | 18.244 | 10.332 | 7.022  |
| H | 18.303 | 8.639  | 6.609  |
| N | 16.410 | 9.345  | 6.901  |
| H | 16.022 | 8.454  | 6.544  |
| C | 8.378  | 18.171 | 8.838  |
| C | 8.203  | 19.285 | 9.944  |
| C | 9.170  | 19.112 | 11.014 |
| C | 9.044  | 17.794 | 11.749 |
| C | 8.780  | 16.589 | 10.767 |
| C | 8.655  | 16.764 | 9.431  |
| C | 8.644  | 15.696 | 8.487  |
| C | 9.418  | 14.612 | 8.624  |
| C | 9.528  | 13.620 | 7.613  |
| C | 10.593 | 12.744 | 7.542  |
| C | 10.854 | 11.789 | 6.491  |
| C | 12.002 | 10.980 | 6.277  |
| C | 13.335 | 11.245 | 6.840  |
| C | 14.157 | 10.151 | 6.556  |
| C | 15.536 | 10.331 | 6.923  |
| C | 7.002  | 18.036 | 8.061  |
| C | 9.459  | 18.622 | 7.924  |
| C | 8.636  | 15.274 | 11.583 |
| C | 8.439  | 13.505 | 6.584  |
| C | 13.811 | 12.642 | 7.258  |
| H | 6.450  | 19.025 | 8.153  |
| H | 6.404  | 17.289 | 8.639  |
| H | 7.034  | 17.780 | 6.999  |
| H | 10.374 | 18.620 | 8.454  |
| H | 9.093  | 19.564 | 7.485  |
| H | 9.697  | 17.744 | 7.298  |
| H | 7.193  | 19.300 | 10.380 |
| H | 8.416  | 20.257 | 9.360  |
| H | 9.262  | 19.889 | 11.787 |
| H | 10.226 | 19.059 | 10.589 |
| H | 8.172  | 17.747 | 12.443 |
| H | 9.858  | 17.468 | 12.422 |
| H | 8.062  | 14.569 | 11.062 |
| H | 7.930  | 15.611 | 12.315 |
| H | 9.607  | 14.994 | 11.935 |
| H | 8.114  | 15.833 | 7.552  |

Continued on next page

Table S16 – Continued from previous page

|                |        |        |       |
|----------------|--------|--------|-------|
| H              | 10.070 | 14.560 | 9.454 |
| H              | 8.463  | 14.272 | 5.781 |
| H              | 7.427  | 13.748 | 7.098 |
| H              | 8.389  | 12.471 | 6.266 |
| H              | 11.332 | 12.823 | 8.340 |
| H              | 10.007 | 11.655 | 5.849 |
| H              | 11.893 | 10.226 | 5.500 |
| H              | 14.557 | 12.592 | 8.041 |
| H              | 14.391 | 13.043 | 6.385 |
| H              | 12.944 | 13.294 | 7.561 |
| H              | 13.823 | 9.232  | 6.149 |
| H              | 15.893 | 11.342 | 7.209 |
| H <sup>a</sup> | 11.336 | 4.687  | 5.016 |
| H <sup>a</sup> | 17.635 | 9.911  | 9.474 |

<sup>a</sup> Hydrogen capping atoms at the QM/MM boundry.



Table S17: Coordinates (Å) for Frame 6 from the **Rho-2** run. The coordinates are for the RPSB+Glu113 QM region employed in the excited-state calculations.

|   |        |        |        |
|---|--------|--------|--------|
| C | 12.300 | 4.958  | 3.845  |
| H | 12.240 | 3.999  | 3.292  |
| H | 12.033 | 5.814  | 3.084  |
| C | 13.676 | 5.203  | 4.464  |
| H | 13.797 | 4.649  | 5.350  |
| H | 14.554 | 4.801  | 3.891  |
| C | 14.099 | 6.678  | 4.741  |
| O | 13.434 | 7.662  | 4.260  |
| O | 15.169 | 6.818  | 5.394  |
| C | 17.943 | 8.972  | 8.351  |
| H | 19.021 | 8.874  | 8.525  |
| H | 17.529 | 7.984  | 8.693  |
| C | 17.822 | 8.954  | 6.824  |
| H | 18.365 | 9.802  | 6.411  |
| H | 18.291 | 8.028  | 6.519  |
| N | 16.429 | 9.014  | 6.360  |
| H | 16.063 | 8.125  | 5.951  |
| C | 8.692  | 18.139 | 9.387  |
| C | 8.668  | 18.686 | 10.832 |
| C | 9.493  | 17.984 | 11.883 |
| C | 9.037  | 16.552 | 11.977 |
| C | 8.867  | 15.889 | 10.637 |
| C | 8.788  | 16.547 | 9.422  |
| C | 8.912  | 15.845 | 8.175  |
| C | 9.760  | 14.817 | 7.960  |
| C | 9.793  | 13.934 | 6.836  |
| C | 10.852 | 13.086 | 6.804  |
| C | 11.031 | 11.992 | 5.979  |
| C | 12.201 | 11.277 | 5.821  |
| C | 13.496 | 11.245 | 6.411  |
| C | 14.314 | 10.172 | 6.116  |
| C | 15.681 | 10.071 | 6.490  |
| C | 7.240  | 18.538 | 8.769  |
| C | 9.827  | 18.738 | 8.577  |
| C | 8.633  | 14.427 | 10.680 |
| C | 8.687  | 14.027 | 5.887  |
| C | 14.036 | 12.302 | 7.270  |
| H | 7.223  | 19.573 | 8.454  |
| H | 6.380  | 18.405 | 9.509  |
| H | 7.270  | 17.944 | 7.810  |
| H | 10.783 | 18.279 | 8.896  |
| H | 9.838  | 19.813 | 8.807  |
| H | 9.786  | 18.396 | 7.535  |
| H | 7.684  | 18.585 | 11.209 |
| H | 8.936  | 19.721 | 10.864 |
| H | 9.293  | 18.558 | 12.792 |
| H | 10.599 | 17.975 | 11.733 |
| H | 8.115  | 16.466 | 12.561 |
| H | 9.811  | 16.068 | 12.630 |
| H | 7.999  | 14.050 | 9.870  |
| H | 8.035  | 14.119 | 11.625 |
| H | 9.554  | 13.842 | 10.643 |
| H | 8.181  | 16.192 | 7.430  |

Continued on next page

Table S17 – Continued from previous page

|                |        |        |       |
|----------------|--------|--------|-------|
| H              | 10.521 | 14.573 | 8.715 |
| H              | 8.575  | 15.088 | 5.602 |
| H              | 7.723  | 13.911 | 6.371 |
| H              | 8.751  | 13.354 | 5.083 |
| H              | 11.539 | 13.261 | 7.616 |
| H              | 10.178 | 11.712 | 5.340 |
| H              | 11.967 | 10.373 | 5.248 |
| H              | 15.143 | 12.407 | 7.180 |
| H              | 13.652 | 13.304 | 6.892 |
| H              | 13.713 | 12.104 | 8.306 |
| H              | 14.046 | 9.436  | 5.319 |
| H              | 16.179 | 10.990 | 6.780 |
| H <sup>a</sup> | 11.455 | 4.930  | 4.533 |
| H <sup>a</sup> | 17.496 | 9.764  | 8.952 |

<sup>a</sup> Hydrogen capping atoms at the QM/MM boundry.

Table S18: Cooridantes (Å) for Frame 7 from the **Rho-2** run. The coordinates are for the RPSB+Glu113 QM region employed in the excited-state calculations.

|   |        |        |        |
|---|--------|--------|--------|
| C | 12.184 | 4.657  | 4.417  |
| H | 12.289 | 3.556  | 4.184  |
| H | 12.070 | 5.075  | 3.428  |
| C | 13.455 | 5.123  | 5.113  |
| H | 13.397 | 4.823  | 6.182  |
| H | 14.336 | 4.530  | 4.706  |
| C | 13.797 | 6.587  | 5.009  |
| O | 13.125 | 7.370  | 4.357  |
| O | 14.793 | 6.992  | 5.773  |
| C | 17.862 | 9.016  | 8.797  |
| H | 18.976 | 8.890  | 8.870  |
| H | 17.433 | 8.164  | 9.297  |
| C | 17.641 | 9.045  | 7.306  |
| H | 18.100 | 9.892  | 6.848  |
| H | 18.191 | 8.175  | 6.900  |
| N | 16.238 | 8.987  | 6.786  |
| H | 15.836 | 8.095  | 6.379  |
| C | 8.594  | 18.393 | 8.833  |
| C | 8.293  | 19.200 | 10.054 |
| C | 9.172  | 18.810 | 11.229 |
| C | 8.853  | 17.305 | 11.783 |
| C | 8.568  | 16.432 | 10.498 |
| C | 8.652  | 16.888 | 9.260  |
| C | 8.619  | 15.922 | 8.043  |
| C | 9.396  | 14.856 | 8.017  |
| C | 9.532  | 13.906 | 6.941  |
| C | 10.483 | 12.909 | 7.096  |
| C | 10.801 | 11.938 | 6.057  |
| C | 11.949 | 11.136 | 5.865  |
| C | 13.266 | 11.277 | 6.318  |
| C | 14.099 | 10.132 | 6.452  |
| C | 15.471 | 10.146 | 6.787  |
| C | 7.406  | 18.561 | 7.785  |
| C | 9.987  | 18.800 | 8.202  |
| C | 8.200  | 15.016 | 10.891 |
| C | 8.572  | 13.974 | 5.841  |
| C | 13.820 | 12.594 | 6.719  |
| H | 7.432  | 19.592 | 7.418  |
| H | 6.424  | 18.503 | 8.281  |
| H | 7.485  | 17.950 | 6.869  |
| H | 10.756 | 18.869 | 8.973  |
| H | 9.986  | 19.741 | 7.593  |
| H | 10.250 | 17.946 | 7.591  |
| H | 7.238  | 19.067 | 10.323 |
| H | 8.562  | 20.257 | 9.760  |
| H | 9.150  | 19.632 | 11.943 |
| H | 10.249 | 18.796 | 10.893 |
| H | 7.983  | 17.218 | 12.447 |
| H | 9.716  | 16.951 | 12.342 |
| H | 7.797  | 14.424 | 10.054 |
| H | 7.394  | 15.077 | 11.738 |
| H | 9.131  | 14.538 | 11.237 |
| H | 8.065  | 16.253 | 7.168  |

Continued on next page

Table S18 – Continued from previous page

|                |        |        |       |
|----------------|--------|--------|-------|
| H              | 10.038 | 14.687 | 8.885 |
| H              | 8.453  | 14.980 | 5.392 |
| H              | 7.578  | 13.660 | 6.214 |
| H              | 8.817  | 13.233 | 5.102 |
| H              | 11.091 | 13.044 | 8.036 |
| H              | 9.918  | 11.697 | 5.414 |
| H              | 11.775 | 10.269 | 5.241 |
| H              | 14.794 | 12.728 | 6.291 |
| H              | 13.135 | 13.381 | 6.402 |
| H              | 13.935 | 12.526 | 7.863 |
| H              | 13.772 | 9.116  | 6.108 |
| H              | 15.940 | 11.094 | 7.155 |
| H <sup>a</sup> | 11.262 | 4.802  | 4.980 |
| H <sup>a</sup> | 17.556 | 9.877  | 9.392 |

<sup>a</sup> Hydrogen capping atoms at the QM/MM boundry.

Table S19: Cooridantes (Å) for Frame 8 from the **Rho-2** run. The coordinates are for the RPSB+Glu113 QM region employed in the excited-state calculations.

|   |        |        |        |
|---|--------|--------|--------|
| C | 12.496 | 4.387  | 4.513  |
| H | 12.545 | 3.429  | 4.036  |
| H | 12.189 | 5.090  | 3.768  |
| C | 13.832 | 4.737  | 5.149  |
| H | 13.936 | 4.417  | 6.190  |
| H | 14.708 | 4.233  | 4.653  |
| C | 14.187 | 6.261  | 5.128  |
| O | 13.482 | 7.101  | 4.549  |
| O | 15.188 | 6.507  | 5.896  |
| C | 17.756 | 8.583  | 8.568  |
| H | 18.863 | 8.543  | 8.670  |
| H | 17.322 | 7.659  | 8.945  |
| C | 17.443 | 8.900  | 7.138  |
| H | 17.752 | 9.911  | 6.930  |
| H | 18.047 | 8.244  | 6.520  |
| N | 16.062 | 8.774  | 6.808  |
| H | 15.805 | 7.875  | 6.252  |
| C | 8.509  | 18.313 | 8.270  |
| C | 8.130  | 19.302 | 9.355  |
| C | 8.860  | 19.033 | 10.689 |
| C | 8.418  | 17.671 | 11.235 |
| C | 8.447  | 16.580 | 10.203 |
| C | 8.545  | 16.811 | 8.861  |
| C | 8.511  | 15.780 | 7.870  |
| C | 9.240  | 14.672 | 7.835  |
| C | 9.271  | 13.621 | 6.897  |
| C | 10.322 | 12.737 | 7.067  |
| C | 10.594 | 11.563 | 6.319  |
| C | 11.736 | 10.843 | 6.300  |
| C | 13.100 | 10.992 | 6.768  |
| C | 13.898 | 9.885  | 6.520  |
| C | 15.235 | 9.829  | 6.864  |
| C | 7.372  | 18.357 | 7.253  |
| C | 9.821  | 18.698 | 7.619  |
| C | 8.248  | 15.252 | 10.909 |
| C | 8.192  | 13.518 | 5.878  |
| C | 13.661 | 12.226 | 7.455  |
| H | 6.915  | 19.347 | 7.031  |
| H | 6.537  | 17.835 | 7.767  |
| H | 7.671  | 17.840 | 6.299  |
| H | 10.625 | 18.856 | 8.401  |
| H | 9.641  | 19.678 | 7.145  |
| H | 10.125 | 17.843 | 6.968  |
| H | 7.069  | 19.266 | 9.576  |
| H | 8.266  | 20.383 | 9.036  |
| H | 8.532  | 19.804 | 11.392 |
| H | 9.941  | 19.259 | 10.505 |
| H | 7.326  | 17.946 | 11.370 |
| H | 8.945  | 17.323 | 12.108 |
| H | 8.250  | 14.501 | 10.136 |
| H | 7.284  | 15.228 | 11.478 |
| H | 9.201  | 15.004 | 11.466 |
| H | 7.891  | 16.009 | 7.018  |

Continued on next page

Table S19 – Continued from previous page

|                |        |        |       |
|----------------|--------|--------|-------|
| H              | 9.966  | 14.469 | 8.688 |
| H              | 7.890  | 14.520 | 5.435 |
| H              | 7.220  | 13.221 | 6.341 |
| H              | 8.351  | 12.846 | 5.067 |
| H              | 10.890 | 13.022 | 7.977 |
| H              | 9.867  | 11.302 | 5.563 |
| H              | 11.602 | 9.870  | 5.712 |
| H              | 12.960 | 13.066 | 7.291 |
| H              | 13.649 | 12.093 | 8.553 |
| H              | 14.646 | 12.430 | 7.050 |
| H              | 13.540 | 9.090  | 5.808 |
| H              | 15.689 | 10.763 | 7.261 |
| H <sup>a</sup> | 11.685 | 4.397  | 5.241 |
| H <sup>a</sup> | 17.473 | 9.433  | 9.190 |

<sup>a</sup> Hydrogen capping atoms at the QM/MM boundry.

Table S20: Cooridantes (Å) for Frame 9 from the **Rho-2** run. The coordinates are for the RPSB+Glu113 QM region employed in the excited-state calculations.

|   |        |        |        |
|---|--------|--------|--------|
| C | 12.310 | 4.639  | 4.058  |
| H | 12.491 | 3.575  | 3.808  |
| H | 11.856 | 5.183  | 3.267  |
| C | 13.653 | 5.190  | 4.576  |
| H | 14.124 | 4.606  | 5.366  |
| H | 14.354 | 5.116  | 3.742  |
| C | 13.787 | 6.694  | 4.863  |
| O | 13.002 | 7.531  | 4.325  |
| O | 14.783 | 7.034  | 5.680  |
| C | 17.886 | 9.111  | 8.422  |
| H | 19.010 | 9.214  | 8.533  |
| H | 17.588 | 8.086  | 8.872  |
| C | 17.562 | 9.335  | 6.955  |
| H | 17.802 | 10.355 | 6.677  |
| H | 18.177 | 8.725  | 6.250  |
| N | 16.106 | 9.250  | 6.516  |
| H | 15.687 | 8.296  | 6.192  |
| C | 8.385  | 18.075 | 8.674  |
| C | 7.928  | 19.262 | 9.499  |
| C | 8.732  | 19.237 | 10.819 |
| C | 8.343  | 17.981 | 11.573 |
| C | 8.415  | 16.721 | 10.747 |
| C | 8.390  | 16.722 | 9.394  |
| C | 8.357  | 15.550 | 8.551  |
| C | 9.050  | 14.367 | 8.562  |
| C | 9.085  | 13.464 | 7.485  |
| C | 10.218 | 12.654 | 7.470  |
| C | 10.469 | 11.749 | 6.389  |
| C | 11.627 | 11.152 | 5.992  |
| C | 13.026 | 11.266 | 6.421  |
| C | 13.914 | 10.177 | 6.227  |
| C | 15.312 | 10.279 | 6.519  |
| C | 7.406  | 17.969 | 7.463  |
| C | 9.856  | 18.205 | 8.196  |
| C | 8.481  | 15.501 | 11.626 |
| C | 8.103  | 13.622 | 6.356  |
| C | 13.473 | 12.580 | 7.103  |
| H | 7.448  | 19.038 | 6.973  |
| H | 6.391  | 17.861 | 7.863  |
| H | 7.728  | 17.217 | 6.750  |
| H | 10.507 | 18.141 | 9.109  |
| H | 10.071 | 19.132 | 7.663  |
| H | 10.217 | 17.332 | 7.610  |
| H | 6.839  | 19.234 | 9.731  |
| H | 8.157  | 20.237 | 8.945  |
| H | 8.476  | 20.144 | 11.462 |
| H | 9.828  | 19.185 | 10.580 |
| H | 7.402  | 18.004 | 12.003 |
| H | 8.947  | 17.908 | 12.488 |
| H | 8.026  | 14.586 | 11.098 |
| H | 8.062  | 15.735 | 12.609 |
| H | 9.590  | 15.232 | 11.844 |
| H | 7.823  | 15.665 | 7.608  |

Continued on next page

Table S20 – Continued from previous page

|                |        |        |       |
|----------------|--------|--------|-------|
| H              | 9.775  | 14.178 | 9.380 |
| H              | 8.329  | 14.539 | 5.790 |
| H              | 7.070  | 13.730 | 6.833 |
| H              | 7.988  | 12.718 | 5.734 |
| H              | 10.824 | 12.780 | 8.349 |
| H              | 9.576  | 11.560 | 5.803 |
| H              | 11.431 | 10.207 | 5.446 |
| H              | 12.535 | 13.031 | 7.307 |
| H              | 14.048 | 12.353 | 8.036 |
| H              | 13.909 | 13.342 | 6.473 |
| H              | 13.493 | 9.273  | 5.918 |
| H              | 15.711 | 11.273 | 6.762 |
| H <sup>a</sup> | 11.536 | 4.616  | 4.825 |
| H <sup>a</sup> | 17.442 | 9.797  | 9.143 |

<sup>a</sup> Hydrogen capping atoms at the QM/MM boundry.



Table S21: Coordinates (Å) for Frame 10 from the **Rho-2** run. The coordinates are for the RPSB+Glu113 QM region employed in the excited-state calculations.

|   |        |        |        |
|---|--------|--------|--------|
| C | 12.338 | 4.721  | 4.270  |
| H | 12.274 | 3.747  | 3.757  |
| H | 12.106 | 5.473  | 3.553  |
| C | 13.805 | 4.769  | 4.760  |
| H | 13.957 | 4.147  | 5.624  |
| H | 14.504 | 4.445  | 3.998  |
| C | 14.206 | 6.258  | 5.023  |
| O | 13.641 | 7.158  | 4.418  |
| O | 15.256 | 6.449  | 5.790  |
| C | 17.956 | 8.605  | 8.356  |
| H | 19.052 | 8.489  | 8.450  |
| H | 17.517 | 7.677  | 8.861  |
| C | 17.664 | 8.744  | 6.877  |
| H | 18.301 | 9.523  | 6.457  |
| H | 17.968 | 7.780  | 6.413  |
| N | 16.212 | 8.877  | 6.509  |
| H | 15.706 | 8.002  | 6.154  |
| C | 8.324  | 17.945 | 8.559  |
| C | 8.037  | 18.961 | 9.669  |
| C | 9.008  | 18.808 | 10.820 |
| C | 8.789  | 17.440 | 11.518 |
| C | 8.729  | 16.321 | 10.516 |
| C | 8.553  | 16.544 | 9.146  |
| C | 8.596  | 15.475 | 8.124  |
| C | 9.353  | 14.341 | 8.076  |
| C | 9.397  | 13.360 | 7.022  |
| C | 10.533 | 12.622 | 6.997  |
| C | 10.790 | 11.589 | 6.093  |
| C | 11.917 | 10.763 | 5.903  |
| C | 13.267 | 10.995 | 6.267  |
| C | 14.172 | 9.946  | 6.138  |
| C | 15.568 | 10.014 | 6.367  |
| C | 7.220  | 18.003 | 7.513  |
| C | 9.629  | 18.232 | 7.782  |
| C | 8.688  | 14.942 | 11.149 |
| C | 8.313  | 13.272 | 6.008  |
| C | 13.677 | 12.373 | 6.870  |
| H | 6.917  | 19.017 | 7.291  |
| H | 6.349  | 17.394 | 7.788  |
| H | 7.586  | 17.542 | 6.554  |
| H | 10.511 | 18.057 | 8.443  |
| H | 9.656  | 19.336 | 7.482  |
| H | 9.629  | 17.531 | 6.932  |
| H | 6.984  | 18.743 | 10.068 |
| H | 8.074  | 20.066 | 9.394  |
| H | 8.985  | 19.605 | 11.558 |
| H | 10.022 | 18.781 | 10.356 |
| H | 7.819  | 17.492 | 11.976 |
| H | 9.556  | 17.209 | 12.323 |
| H | 7.992  | 14.172 | 10.626 |
| H | 8.219  | 15.085 | 12.107 |
| H | 9.682  | 14.458 | 11.318 |
| H | 7.828  | 15.532 | 7.374  |

Continued on next page

Table S21 – Continued from previous page

|                |        |        |       |
|----------------|--------|--------|-------|
| H              | 10.161 | 14.350 | 8.802 |
| H              | 8.117  | 14.225 | 5.501 |
| H              | 7.300  | 13.111 | 6.453 |
| H              | 8.460  | 12.435 | 5.303 |
| H              | 11.395 | 12.755 | 7.694 |
| H              | 9.865  | 11.225 | 5.697 |
| H              | 11.756 | 9.847  | 5.251 |
| H              | 12.971 | 13.183 | 6.486 |
| H              | 13.609 | 12.313 | 7.977 |
| H              | 14.688 | 12.720 | 6.562 |
| H              | 13.904 | 8.967  | 5.649 |
| H              | 16.010 | 10.994 | 6.546 |
| H <sup>a</sup> | 11.474 | 4.699  | 4.935 |
| H <sup>a</sup> | 17.646 | 9.426  | 9.002 |

<sup>a</sup> Hydrogen capping atoms at the QM/MM boundry.

Table S22: Coordinates (Å) for Frame 11 from the **Rho-3** run. The coordinates are for the RPSB+Glu113 QM region employed in the excited-state calculations.

|   |        |        |        |
|---|--------|--------|--------|
| C | 12.514 | 4.397  | 4.249  |
| H | 12.570 | 3.304  | 3.987  |
| H | 12.136 | 4.987  | 3.431  |
| C | 13.819 | 4.723  | 4.986  |
| H | 13.850 | 4.128  | 5.913  |
| H | 14.712 | 4.504  | 4.322  |
| C | 14.015 | 6.278  | 5.329  |
| O | 13.406 | 7.198  | 4.762  |
| O | 14.952 | 6.420  | 6.244  |
| C | 17.778 | 8.770  | 8.828  |
| H | 18.851 | 8.756  | 8.997  |
| H | 17.372 | 7.901  | 9.293  |
| C | 17.431 | 8.935  | 7.361  |
| H | 17.843 | 9.911  | 6.896  |
| H | 17.974 | 8.127  | 6.787  |
| N | 15.971 | 8.910  | 7.121  |
| H | 15.551 | 7.973  | 6.851  |
| C | 8.723  | 18.433 | 8.882  |
| C | 8.938  | 19.527 | 9.969  |
| C | 10.109 | 19.111 | 10.888 |
| C | 9.541  | 17.917 | 11.706 |
| C | 9.026  | 16.813 | 10.810 |
| C | 8.745  | 17.006 | 9.499  |
| C | 8.594  | 15.924 | 8.563  |
| C | 9.417  | 14.864 | 8.565  |
| C | 9.297  | 13.770 | 7.586  |
| C | 10.355 | 12.870 | 7.585  |
| C | 10.570 | 11.807 | 6.645  |
| C | 11.699 | 11.014 | 6.327  |
| C | 13.027 | 11.058 | 6.794  |
| C | 13.847 | 9.916  | 6.656  |
| C | 15.155 | 10.014 | 7.117  |
| C | 7.349  | 18.775 | 8.197  |
| C | 9.837  | 18.525 | 7.829  |
| C | 8.758  | 15.567 | 11.639 |
| C | 8.077  | 13.603 | 6.714  |
| C | 13.645 | 12.376 | 7.264  |
| H | 7.296  | 19.859 | 8.100  |
| H | 6.549  | 18.568 | 8.908  |
| H | 7.121  | 18.367 | 7.243  |
| H | 10.848 | 18.480 | 8.265  |
| H | 9.780  | 19.420 | 7.246  |
| H | 9.721  | 17.713 | 7.138  |
| H | 8.119  | 19.610 | 10.740 |
| H | 9.141  | 20.509 | 9.502  |
| H | 10.409 | 19.829 | 11.576 |
| H | 11.097 | 18.879 | 10.354 |
| H | 8.731  | 18.291 | 12.361 |
| H | 10.358 | 17.576 | 12.444 |
| H | 8.262  | 14.766 | 11.149 |
| H | 8.081  | 15.975 | 12.385 |
| H | 9.624  | 15.212 | 12.177 |
| H | 7.901  | 16.031 | 7.768  |

Continued on next page

Table S22 – Continued from previous page

|                |        |        |       |
|----------------|--------|--------|-------|
| H              | 10.178 | 14.721 | 9.325 |
| H              | 7.934  | 14.507 | 6.129 |
| H              | 7.221  | 13.275 | 7.242 |
| H              | 8.291  | 12.825 | 5.999 |
| H              | 11.046 | 13.020 | 8.355 |
| H              | 9.739  | 11.533 | 5.991 |
| H              | 11.533 | 10.262 | 5.604 |
| H              | 12.919 | 13.153 | 7.553 |
| H              | 14.287 | 12.129 | 8.112 |
| H              | 14.412 | 12.735 | 6.543 |
| H              | 13.546 | 8.965  | 6.169 |
| H              | 15.563 | 10.922 | 7.505 |
| H <sup>a</sup> | 11.710 | 4.349  | 4.983 |
| H <sup>a</sup> | 17.379 | 9.632  | 9.363 |

<sup>a</sup> Hydrogen capping atoms at the QM/MM boundry.

## References

- (S1) Frisch, M. J.; Trucks, G. W.; Schlegel, H. B.; Scuseria, G. E.; Robb, M. A.; Cheeseman, J. R.; Scalmani, G.; Barone, V.; Mennucci, B.; Petersson, G. A.; Nakatsuji, H.; Caricato, M.; Li, X.; Hratchian, H. P.; Izmaylov, A. F.; Bloino, J.; Zheng, G.; Sonnenberg, J. L.; Hada, M.; Ehara, M.; Toyota, K.; Fukuda, R.; Hasegawa, J.; Ishida, M.; Nakajima, T.; Honda, Y.; Kitao, O.; Nakai, H.; Vreven, T.; Montgomery, J. A., Jr.; Peralta, J. E.; Ogliaro, F.; Bearpark, M.; Heyd, J. J.; Brothers, E.; Kudin, K. N.; Staroverov, V. N.; Kobayashi, R.; Normand, J.; Raghavachari, K.; Rendell, A.; Burant, J. C.; Iyengar, S. S.; Tomasi, J.; Cossi, M.; Rega, N.; Millam, J. M.; Klene, M.; Knox, J. E.; Cross, J. B.; Bakken, V.; Adamo, C.; Jaramillo, J.; Gomperts, R.; Stratmann, R. E.; Yazyev, O.; Austin, A. J.; Cammi, R.; Pomelli, C.; Ochterski, J. W.; Martin, R. L.; Morokuma, K.; Zakrzewski, V. G.; Voth, G. A.; Salvador, P.; Dannenberg, J. J.; Dapprich, S.; Daniels, A. D.; Farkas, Ö.; Foresman, J. B.; Ortiz, J. V.; Cioslowski, J.; Fox, D. J. Gaussian 09 Revision A.02. Gaussian Inc. Wallingford CT 2009.
- (S2) Yanai, T.; Tew, D. P.; Handy, N. C. *Chem. Phys. Lett.* **2004**, *393*, 51–57.
- (S3) Vydrov, O. A.; Heyd, J.; Krukau, A. V.; Scuseria, G. E. *J. Chem. Phys.* **2006**, *125*, 074106.
- (S4) Vydrov, O. A.; Scuseria, G. E. *J. Chem. Phys.* **2006**, *125*, 234109.
- (S5) TURBOMOLE V5.1 2008, a development of University of Karlsruhe and Forschungszentrum Karlsruhe GmbH, 1989-2007, TURBOMOLE GmbH, since 2007; available from <http://www.turbomole.com>.
- (S6) Eichkorn, K.; Treutler, O.; Öhm, H.; Häser, M.; Ahlrichs, R. *Chem. Phys. Lett.* **1995**, *240*, 283–289.
- (S7) Widmark, P.; Malmqvist, P.; Roos, B. O. *Theor. Chem. Acc.* **1990**, *77*, 291–306.
- (S8) Dunning Jr, T. H. *J. Chem. Phys.* **1989**, *90*, 1007–1023.
- (S9) Weigend, F.; Köhn, A.; Hättig, C. *J. Chem. Phys.* **2002**, *116*, 3175.
- (S10) Send, R.; Valsson, O.; Filippi, C. *J. Chem. Theory Comput.* **2011**, *7*, 444–455.
- (S11) Karlström, G.; Lindh, R.; Malmqvist, P.-Å.; Roos, B. O.; Ryde, U.; Veryazov, V.; Widmark, P.-O.; Cossi, M.; Schimmelpfennig, B.; Neogrady, P.; Seijo, L. *Comput. Mater. Sci.* **2003**, *28*, 222–239.
- (S12) Ghigo, G.; Roos, B. O.; Malmqvist, P.-Å. *Chem. Phys. Lett.* **2004**, *396*, 142–149.

- (S13) Forsberg, N.; Malmqvist, P.-Å. *Chem. Phys. Lett.* **1997**, *274*, 196–204.
- (S14) Aquilante, F.; Malmqvist, P.-Å.; Pedersen, T. B.; Ghosh, A.; Roos, B. O. *J. Chem. Theory Comput.* **2008**, *4*, 694–702.
- (S15) Ferré, N.; Ángyán, J. G. *Chem. Phys. Lett.* **2002**, *356*, 331 – 339.
- (S16) Angeli, C.; Cimiraglia, R.; Evangelisti, S.; Leininger, T.; Malrieu, J.-P. *J. Chem. Phys.* **2001**, *114*, 10252–10264.
- (S17) Angeli, C.; Cimiraglia, R.; Malrieu, J.-P. *Chem. Phys. Lett.* **2001**, *350*, 297–305.
- (S18) Angeli, C.; Cimiraglia, R.; Malrieu, J.-P. *J. Chem. Phys.* **2002**, *117*, 9138–9153.
- (S19) Angeli, C.; Pastore, M.; Cimiraglia, R. *Theor. Chem. Acc.* **2007**, *117*, 743–754.
- (S20) Neese, F. ORCA – an ab initio, Density Functional and Semiempirical program package, Version 2.8. Max-Planck-Institut für Bioanorganische Chemie, Mülheim an der Ruhr, 2011.
- (S21) Neese, F. *WIREs Comput Mol Sc* **2012**, *2*, 73–78.
- (S22) Neese, F.; Wennmohs, F.; Hansen, A.; Becker, U. *Chem. Phys.* **2009**, *356*, 98–109.
- (S23) Dyall, K. G. *J. Chem. Phys.* **1995**, *102*, 4909–4918.
- (S24) Angeli, C.; Cimiraglia, R.; Malrieu, J.-P. *Chem. Phys. Lett.* **2000**, *317*, 472–480.
- (S25) CHAMP is a quantum Monte Carlo program package written by C. J. Umrigar, C. Filippi and collaborators.
- (S26) Burkatzki, M.; Filippi, C.; Dolg, M. *J. Chem. Phys.* **2007**, *126*, 234105.
- (S27) Filippi, C.; Umrigar, C. J. *J. Chem. Phys.* **1996**, *105*, 213–226, As Jastrow correlation factor, we use the exponential of the sum of three fifth-order polynomials of the electron-nuclear (e-n), the electron-electron (e-e), and of pure 3-body mixed e-e and e-n distances, respectively. The Jastrow factor is adapted to deal with pseudo-atoms, and the scaling factor  $\kappa$  is set to 0.6 a.u.
- (S28) Schmidt, M. W.; Baldridge, K. K.; Boatz, J. A.; Elbert, S. T.; Gordon, M. S.; Jensen, J. H.; Koseki, S.; Matsunaga, N.; Nguyen, K. A.; Su, S.; Windus, T. L.; Dupuis, M.; Jr, J. A. M. *J. Comput. Chem.* **1993**, *14*, 1347–1363.
- (S29) Schautz, F.; Filippi, C. *J. Chem. Phys.* **2004**, *120*, 10931–10941.
- (S30) Casula, M. *Phys. Rev. B* **2006**, *74*, 161102.

- (S31) We add one s and one p diffuse function on the carbon and the nitrogen using exponents from the aug-cc-pVDZ basis set, taken from EMSL Basis Set Library (<http://bse.pnl.gov>, accessed Sept 1, 2012).
- (S32) Laio, A.; VandeVondele, J.; Rothlisberger, U. *J. Chem. Phys.* **2002**, *116*, 6941.
- (S33) Strambi, A.; Coto, P. B.; Ferré, N.; Olivucci, M. *Theor. Chem. Acc.* **2007**, *118*, 185–191.
- (S34) Melaccio, F.; Olivucci, M.; Lindh, R.; Ferré, N. *Int. J. Quantum Chem.* **2011**, *111*, 3339–3346.
- (S35) see [http://sites.univ-provence.fr/lcp-ct/ferre/nf\\_tinker\\_qmmm.html](http://sites.univ-provence.fr/lcp-ct/ferre/nf_tinker_qmmm.html) (accessed Sept 1, 2012).
- (S36) Ponder, J. W.; Richards, F. M. *J. Comput. Chem.* **1987**, *8*, 1016–1024.
- (S37) Becke, A. D. *Phys. Rev. A* **1988**, *38*, 3098–3100.
- (S38) Lee, C.; Yang, W.; Parr, R. G. *Phys. Rev. B* **1988**, *37*, 785–789.
- (S39) Okada, T.; Sugihara, M.; Bondar, A.-N.; Elstner, M.; Entel, P.; Buss, V. *J. Mol. Biol.* **2004**, *342*, 571–583.
- (S40) Valsson, O.; Angeli, C.; Filippi, C. *Phys. Chem. Chem. Phys.* **2012**, *14*, 11015.
- (S41) Wanko, M.; Hoffmann, M.; Strodel, P.; Koslowski, A.; Thiel, W.; Neese, F.; Frauenheim, T.; Elstner, M. *J. Phys. Chem. B* **2005**, *109*, 3606–3615.
- (S42) Valsson, O.; Filippi, C. *J. Chem. Theory Comput.* **2010**, *6*, 1275–1292.
- (S43) Cembran, A.; Bernardi, F.; Olivucci, M.; Garavelli, M. *Proc. Natl. Acad. Sci. U.S.A.* **2005**, *102*, 6255–6260.
- (S44) Valsson, O.; Filippi, C. *J. Phys. Chem. Lett.* **2012**, *3*, 908–912.
- (S45) Pastore, M.; Angeli, C.; Cimiraglia, R. *Theor. Chem. Acc.* **2007**, *118*, 35–46.
- (S46) Angeli, C.; Cimiraglia, R.; Cestari, M. *Theor. Chem. Acc.* **2009**, *123*, 287–298.
- (S47) Angeli, C.; Pastore, M. *J. Chem. Phys.* **2011**, *134*, 184302.
